# Supplementary material
Source: PubMed Central journal article supplement (PMC7610573)
Supplement: EMS118801-supplement-Western_Blot_Raw_Data_Extended_Data_Fig_7.pdf [file EMS118801-supplement-Western_Blot_Raw_Data_Extended_Data_Fig_7.pdf]

**Ext. Data**

**Fig. 7g**

**JBP**

RAW blots (as scanned)

RAS

**Extended Data  
Fig. 7g**

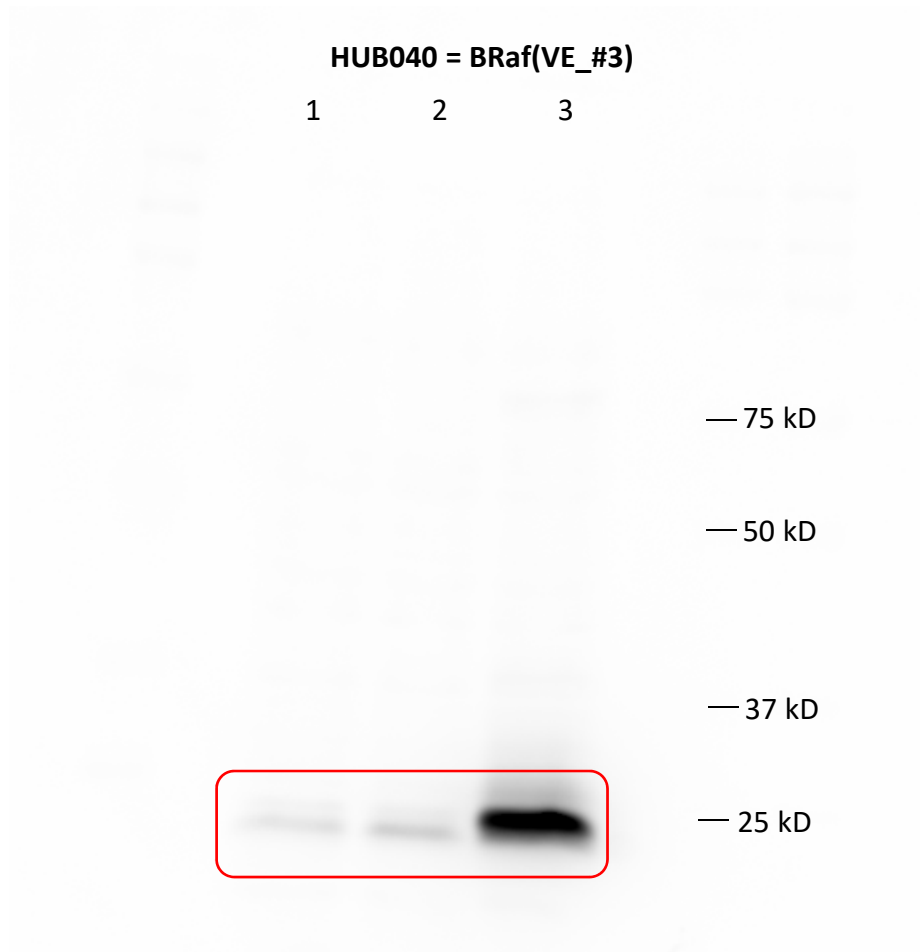

Marker

- 1 HUB040 EKARENS5
- 2 HUB040 EKARENS5 + pInducer (no dox)
- 3 HUB040 EKARENS5 + pInducer (+ dox)

RAW blots (as scanned)

RAS

Extended Data  
Fig. 7g

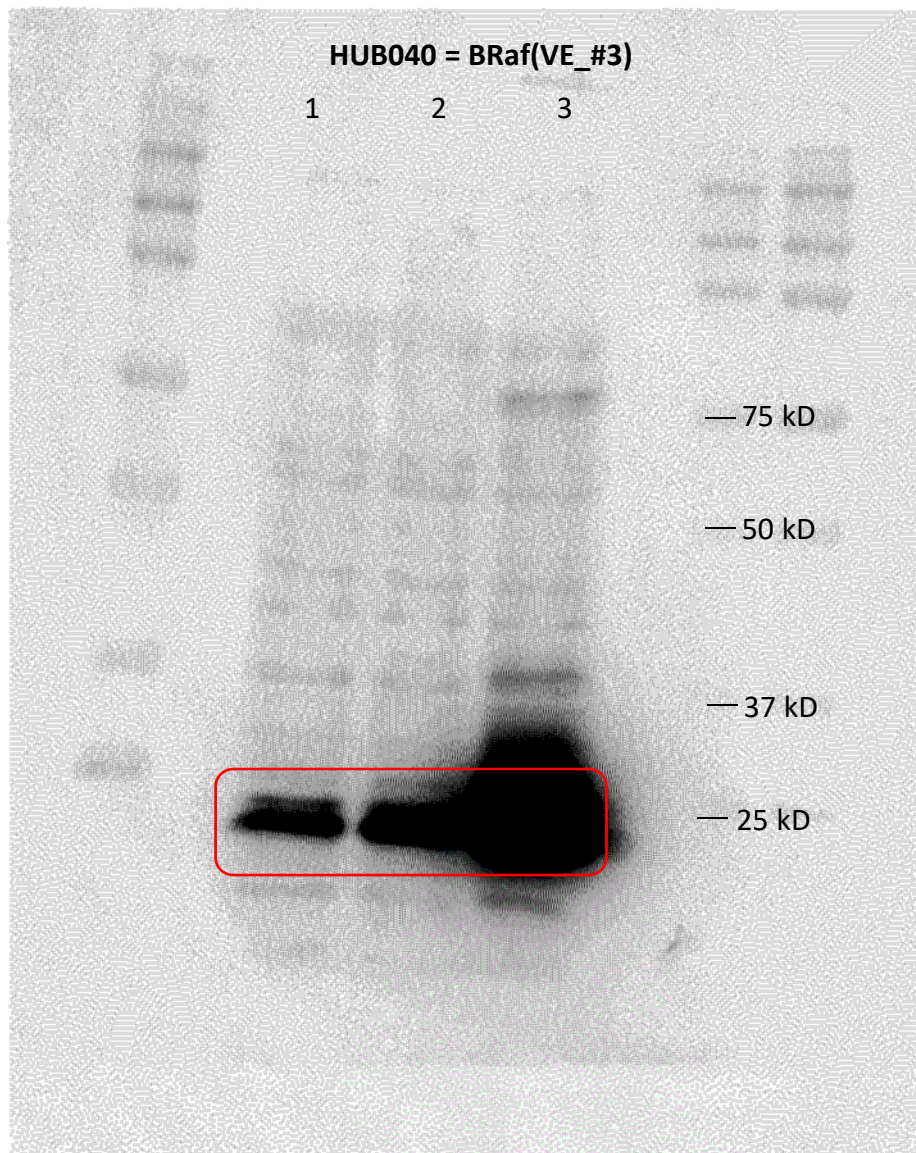

Marker

- 1 HUB040 EKARENS
- 2 HUB040 EKARENS + pInducer (no dox)
- 3 HUB040 EKARENS + pInducer (+ dox)

signal cranked up

RAW blots (as scanned)

Vinculin

**Extended Data  
Fig. 7g**

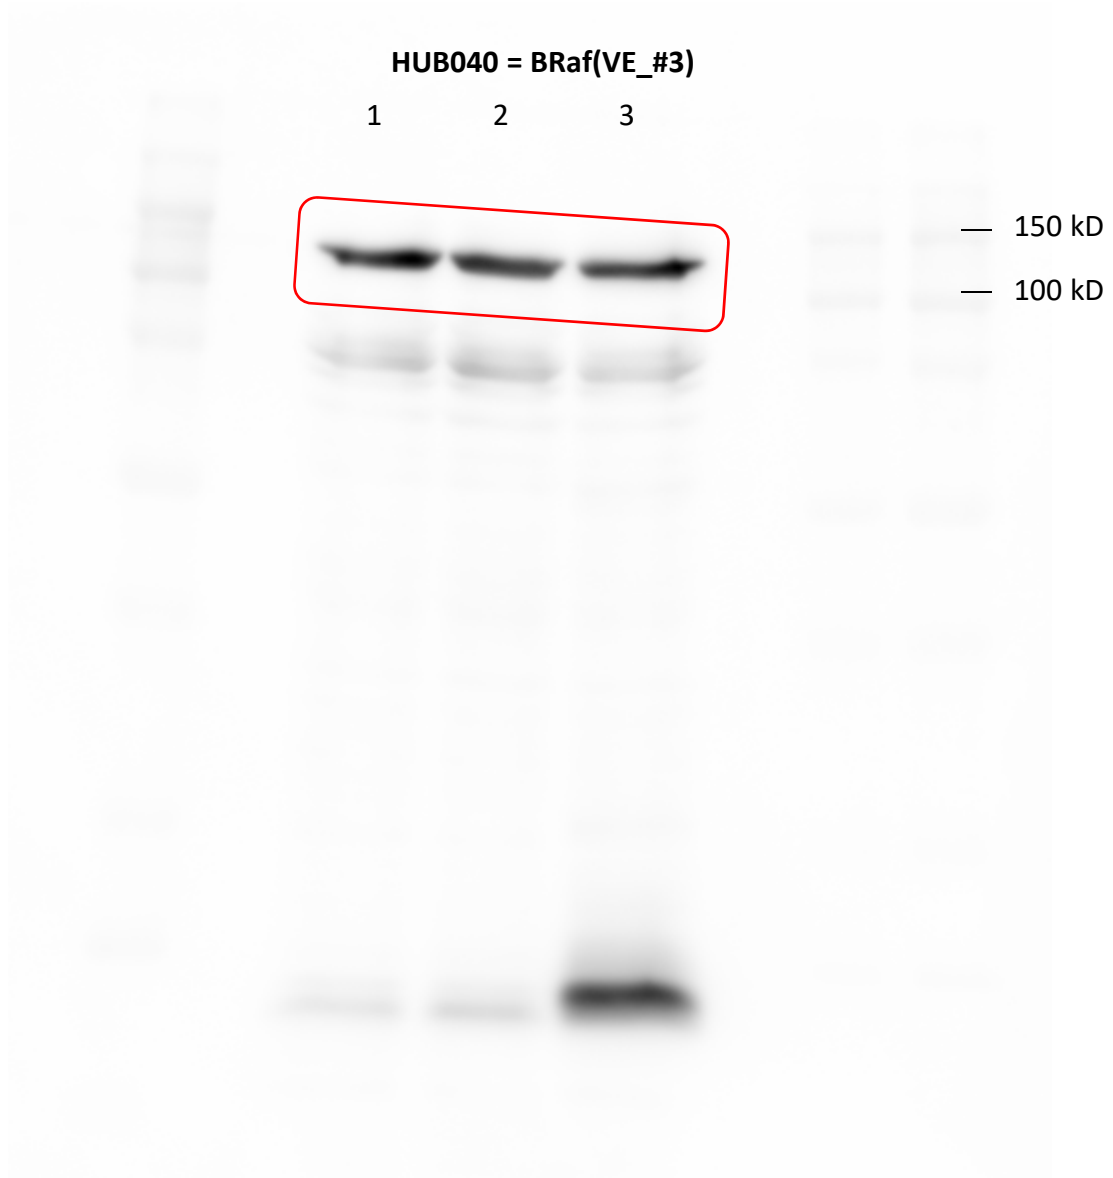

Marker

- 1 HUB040 EKARENS
- 2 HUB040 EKARENS + pInducer (no dox)
- 3 HUB040 EKARENS + pInducer (+ dox)

RAW blots (as scanned)

Vinculin

**Extended Data  
Fig. 7g**

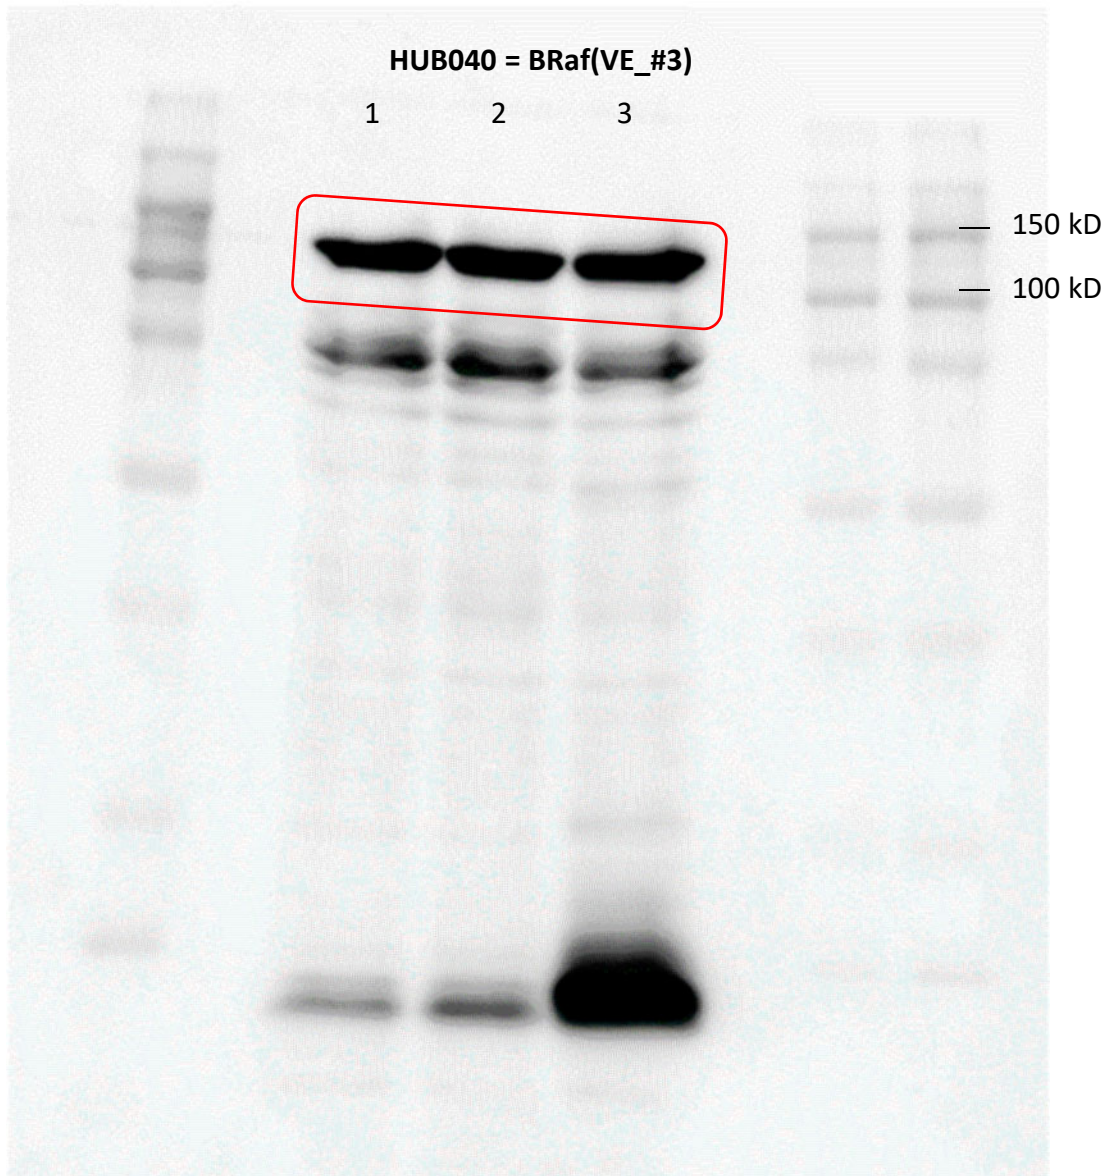

Marker

- 1 HUB040 EKARENS
- 2 HUB040 EKARENS + pInducer (no dox)
- 3 HUB040 EKARENS + pInducer (+ dox)

**signal cranked up**

**Ext. Data**

**Fig. 7h**

**JBP**

RAW blots (as scanned)

pEGFR

Extended Data  
Fig. 7h

Marker  
DMSO  
Afatinib  
Sel+SCH  
PMA+OA

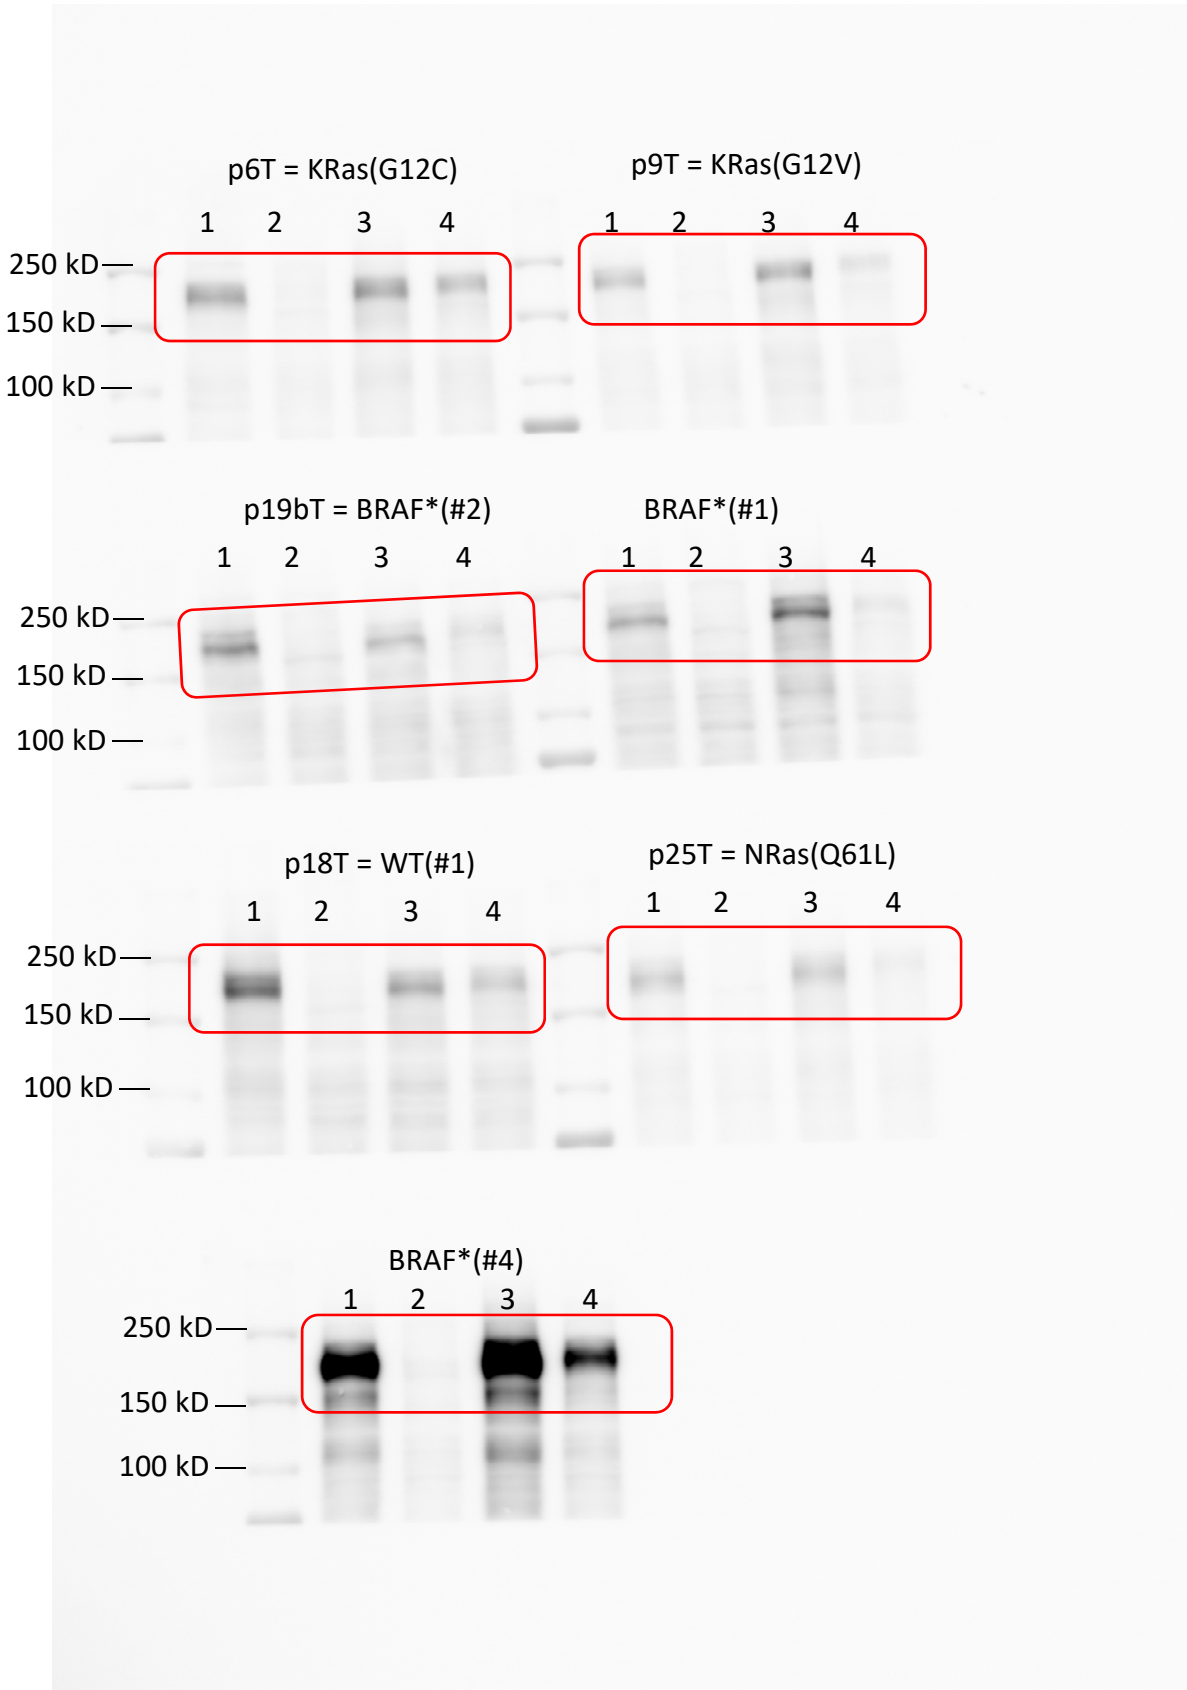

RAW blots (as scanned)

pEGFR

Extended Data  
Fig. 7h

Marker  
DMSO  
Afatinib  
Sel+SCH  
PMA+OA

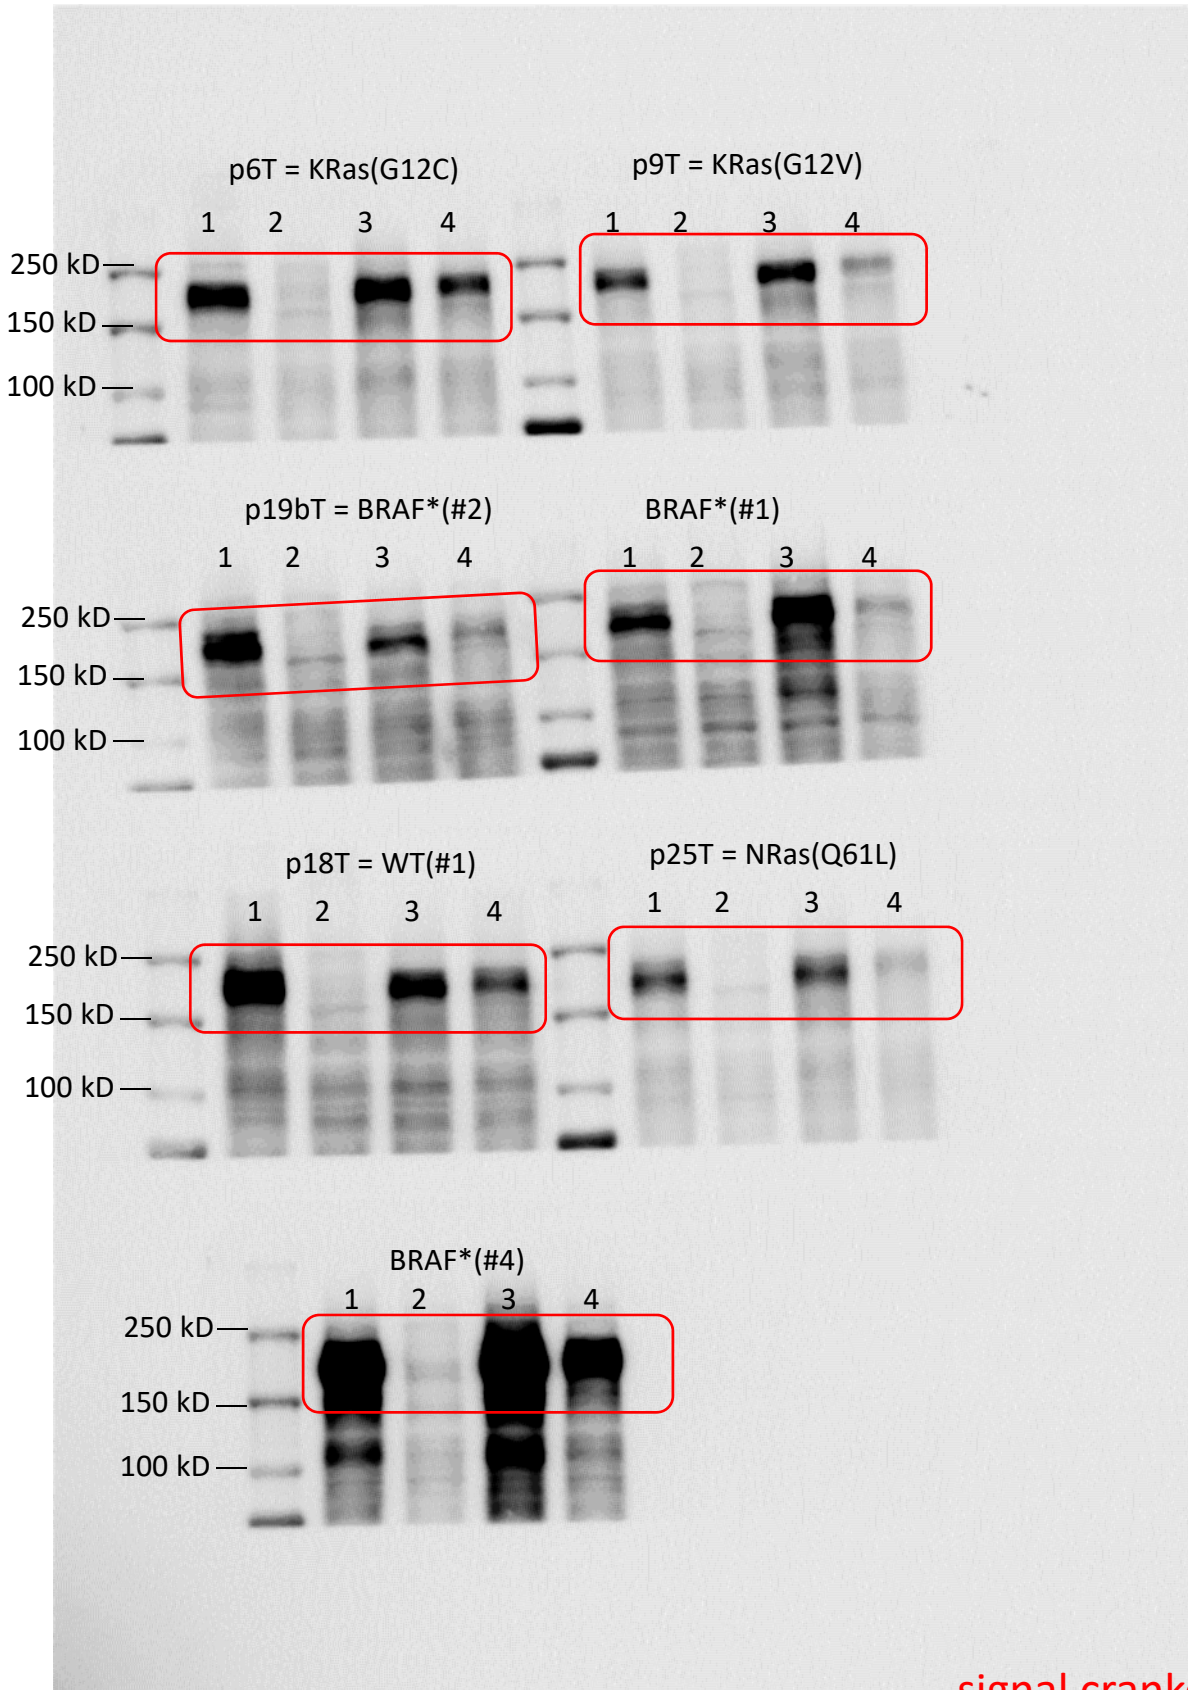

signal cranked up



RAW blots (as scanned)

total EGFR

Extended Data  
Fig. 7h

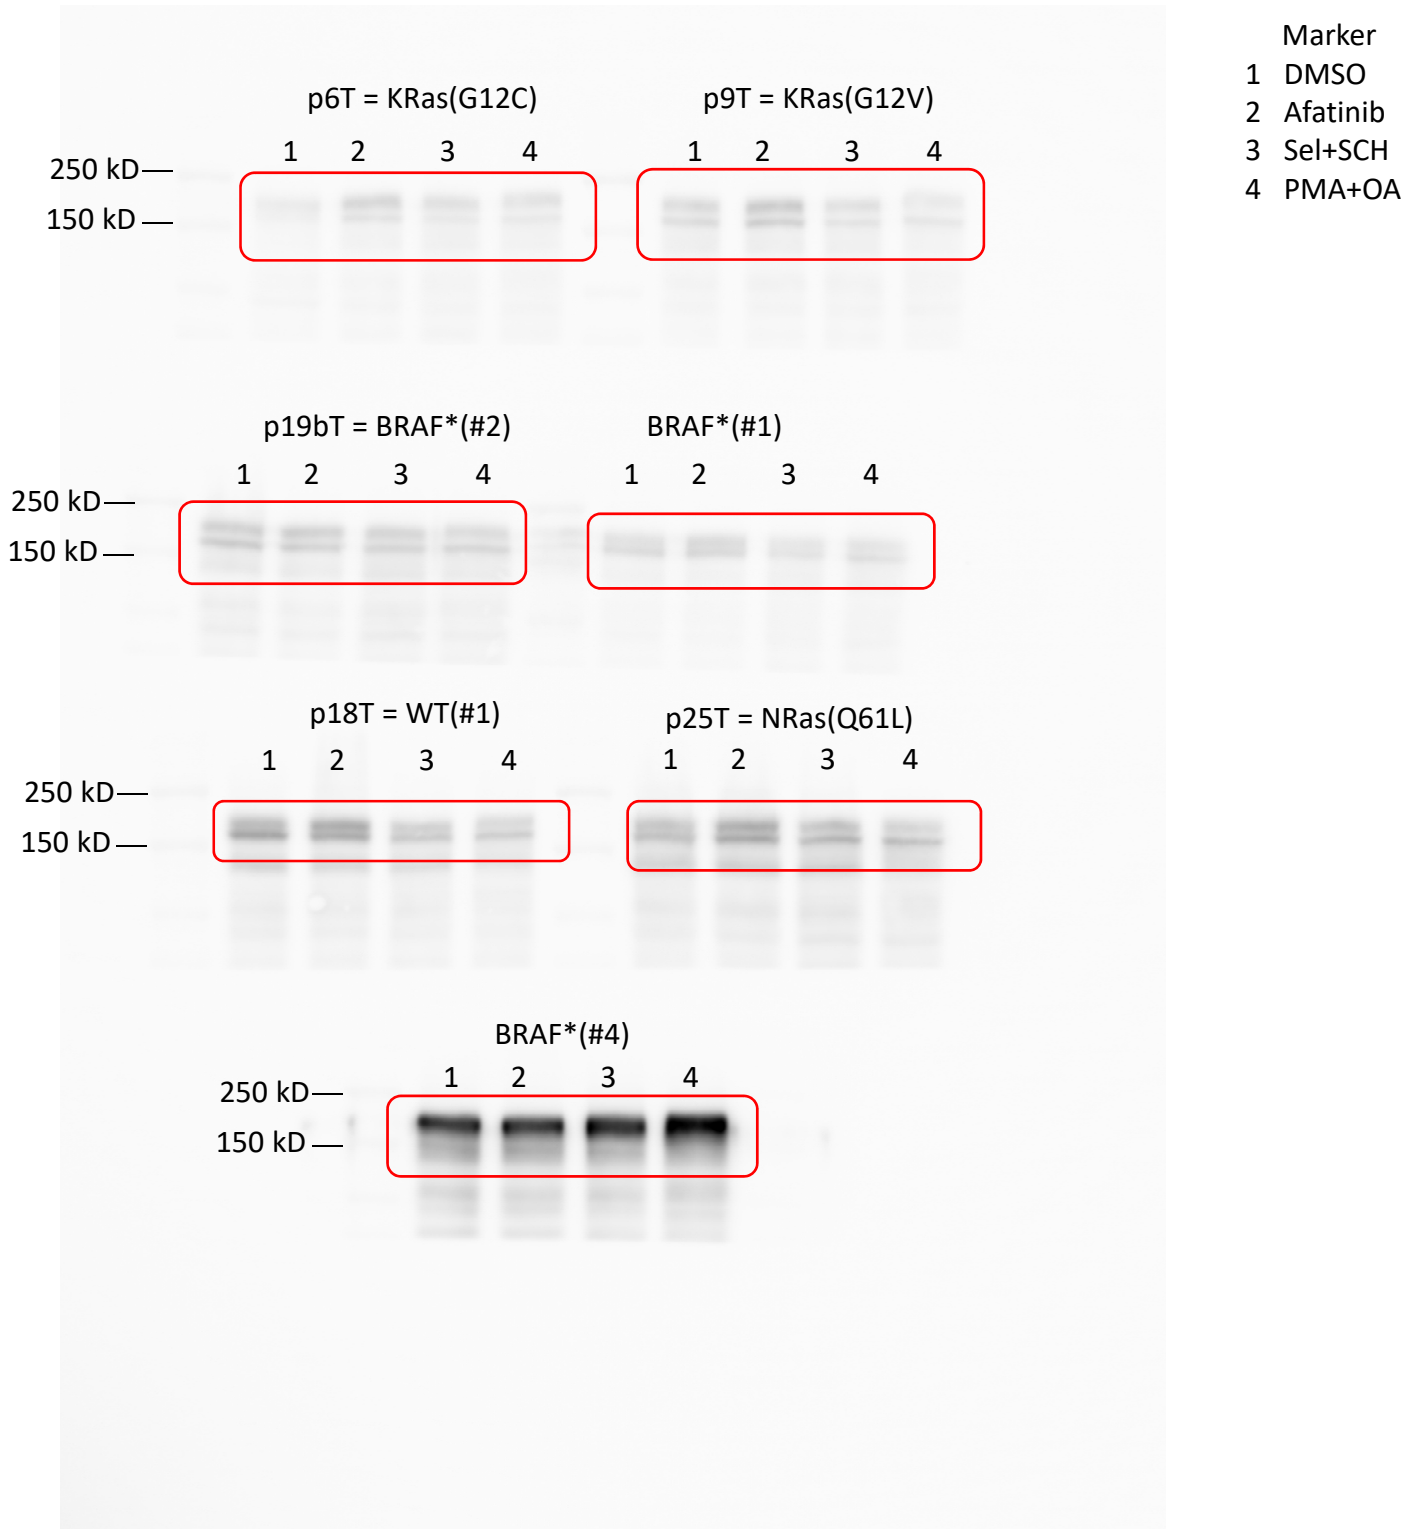

RAW blots (as scanned)

total EGFR

Extended Data  
Fig. 7h

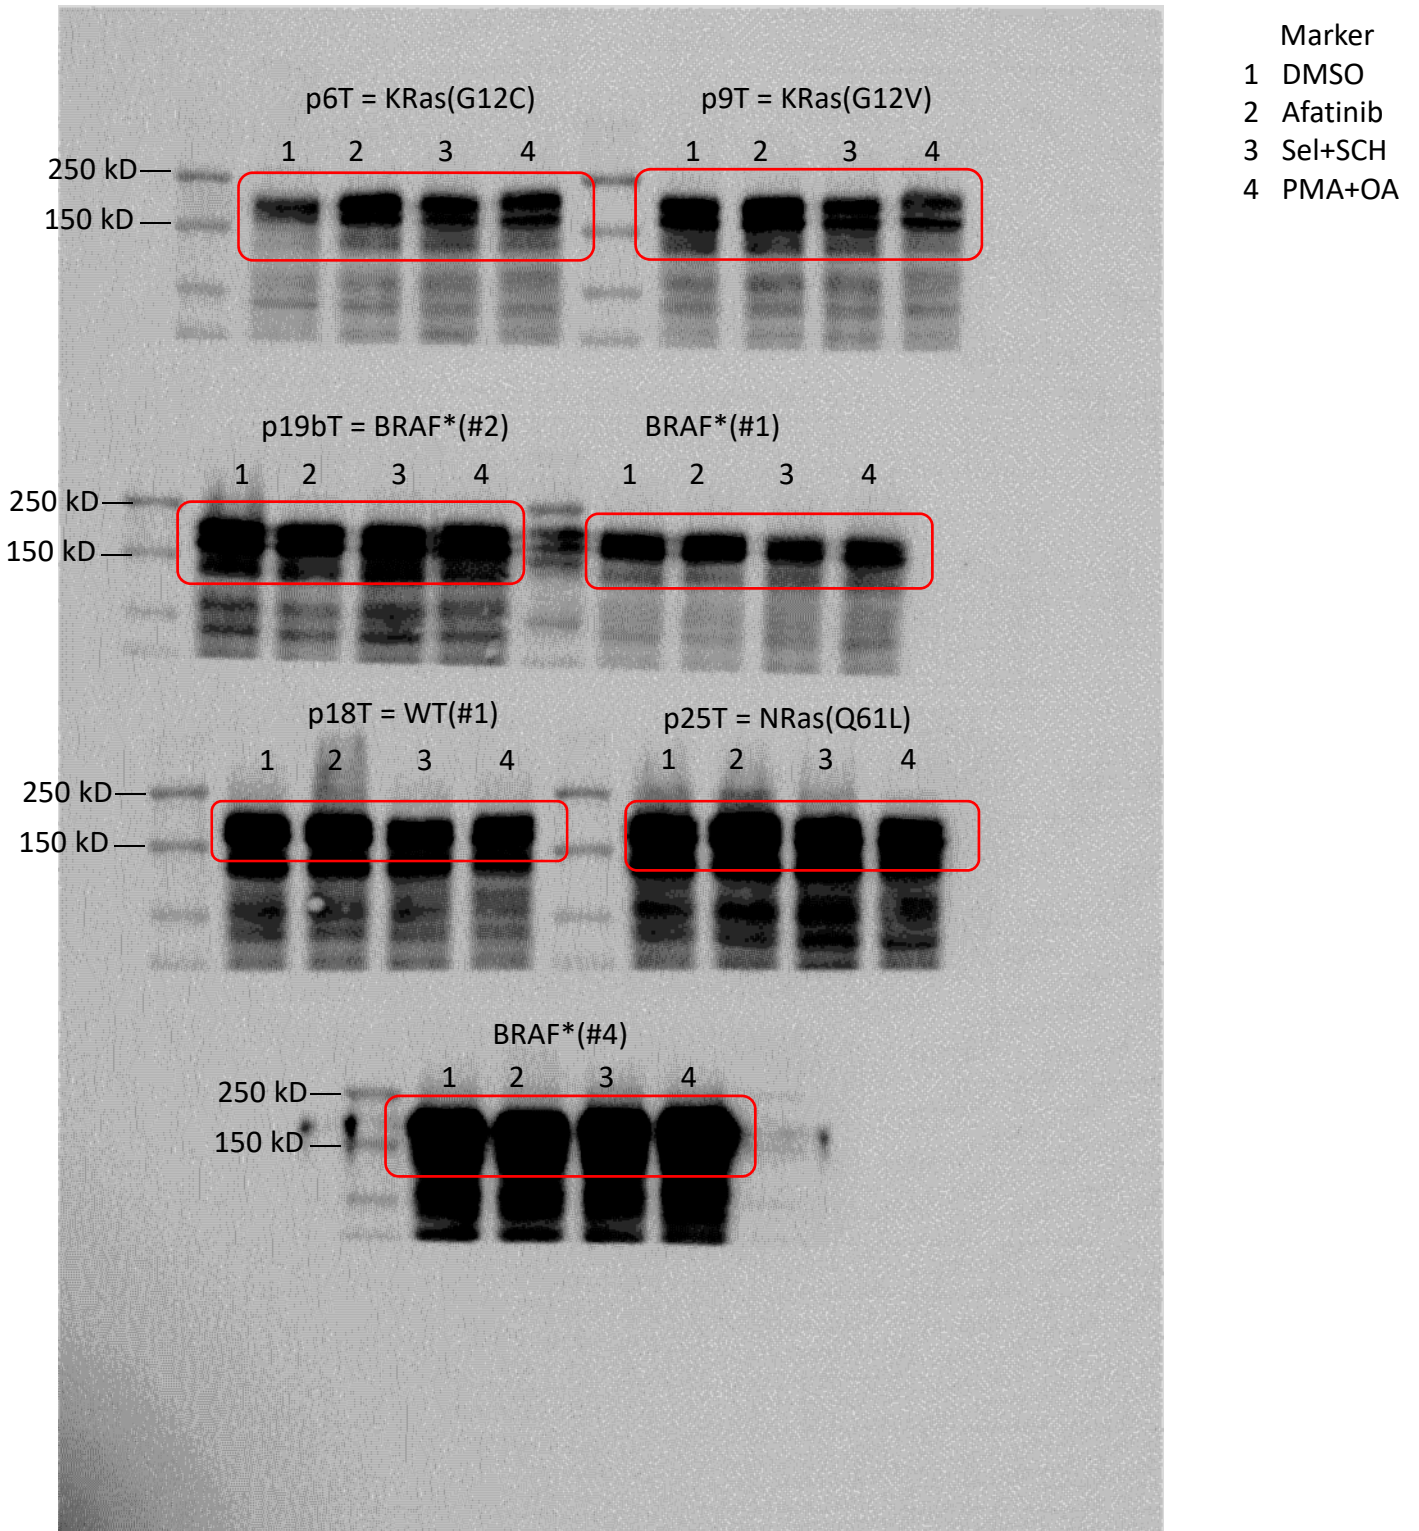

signal cranked up

RAW blots (as scanned)

phospho-MEK

Extended Data  
Fig. 7h

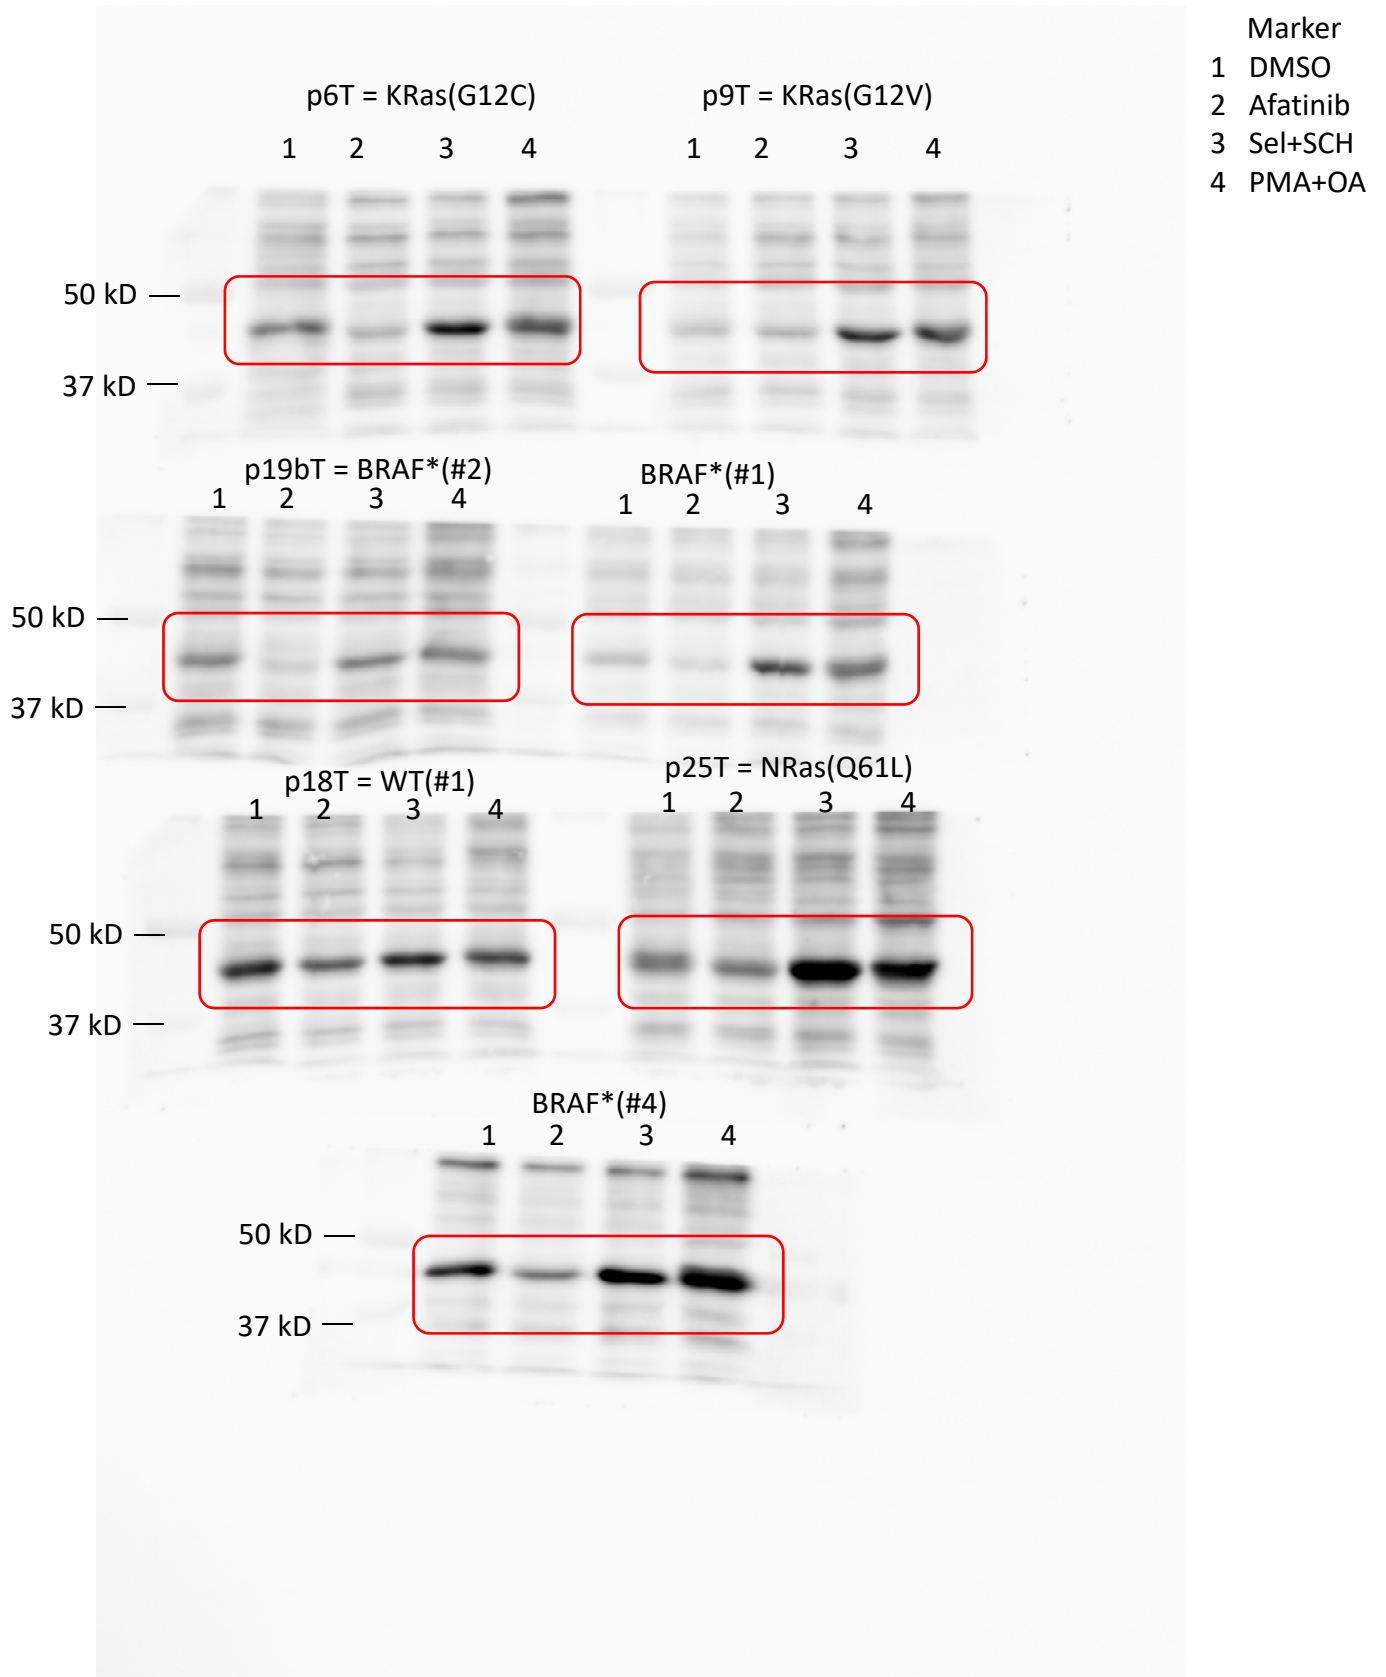

RAW blots (as scanned)

phospho-MEK

Extended Data  
Fig. 7h

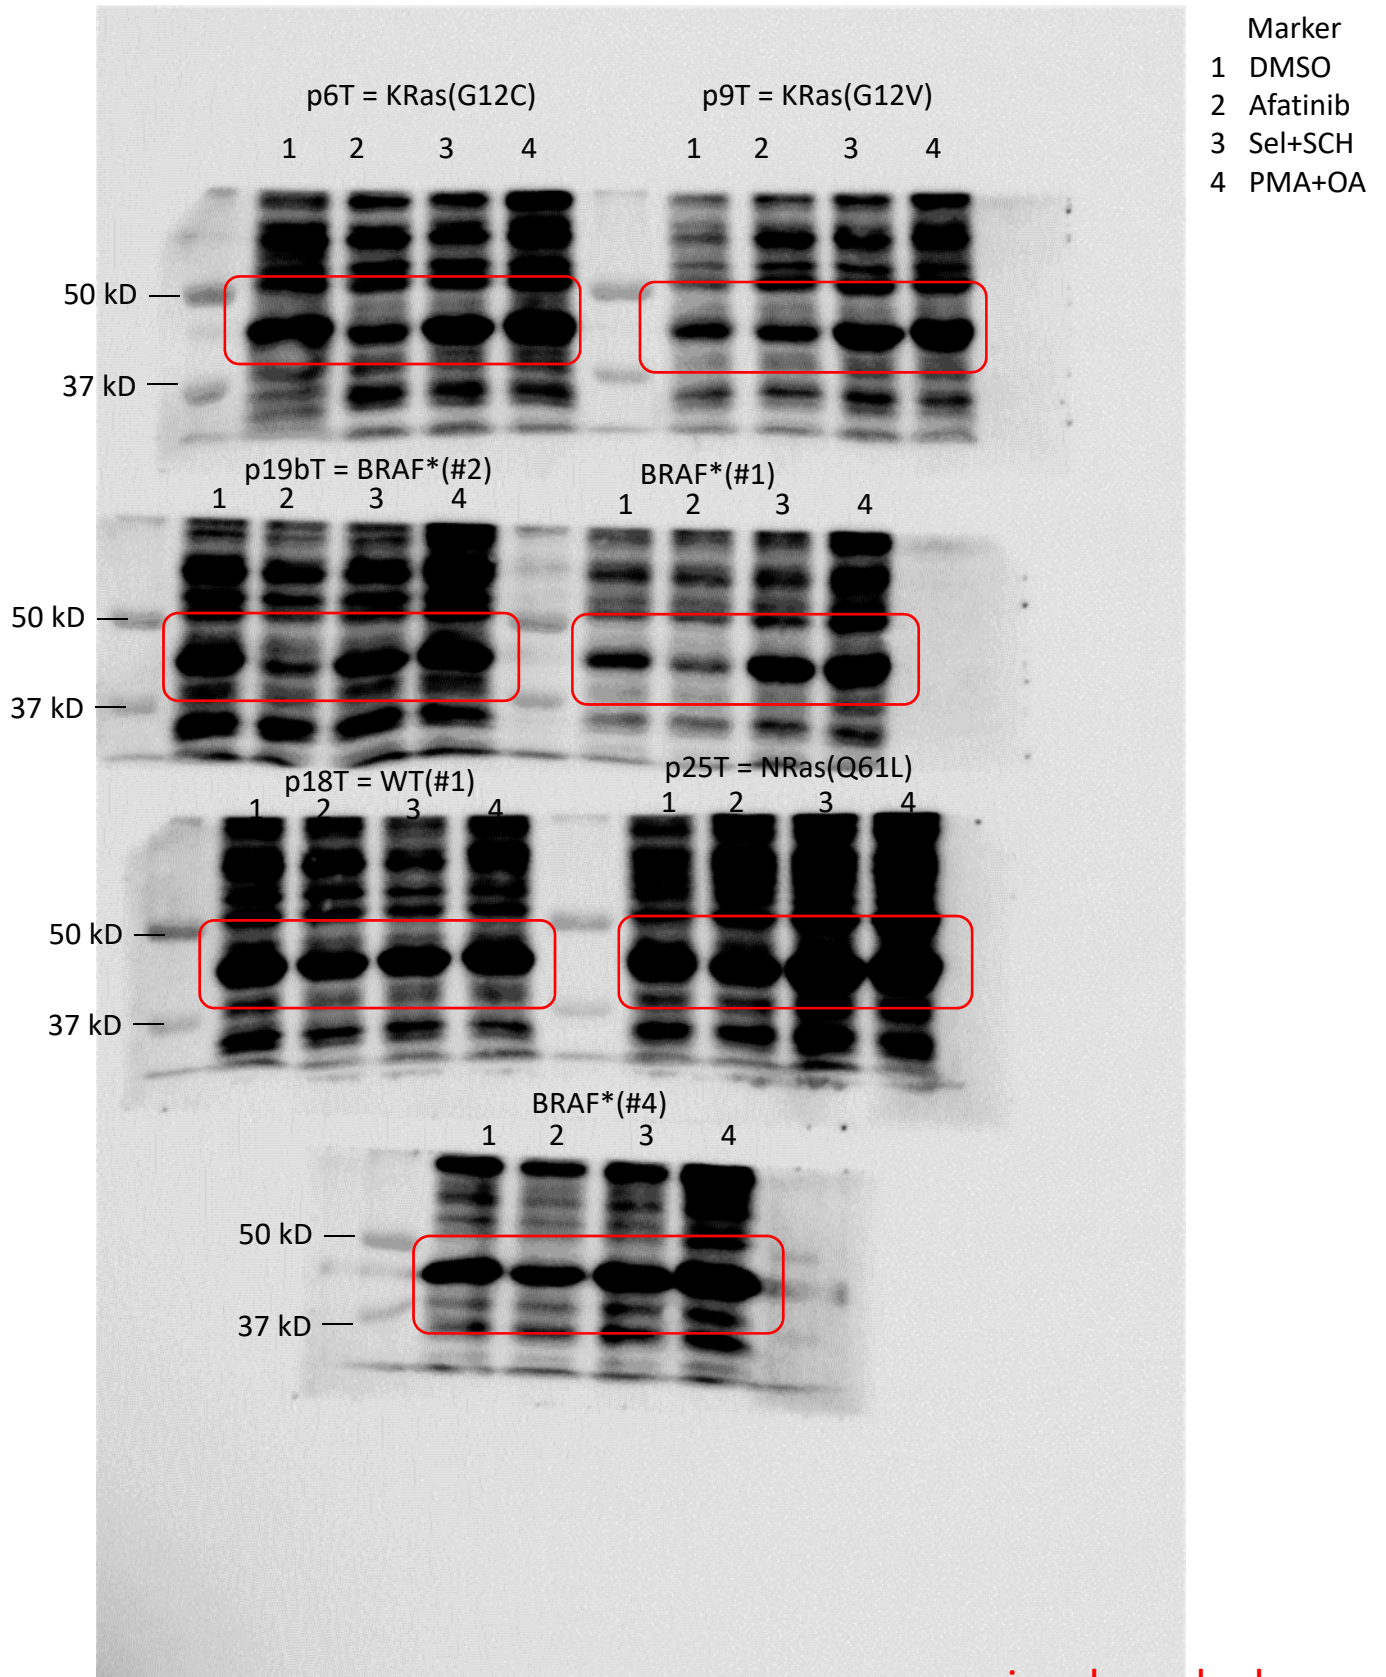

signal cranked up

RAW blots (as scanned)

phospho-MEK

Extended Data  
Fig. 7h



RAW blots (as scanned)

phospho-MEK

Extended Data  
Fig. 7h



signal cranked up

RAW blots (as scanned)

total MEK

Extended Data  
Fig. 7h

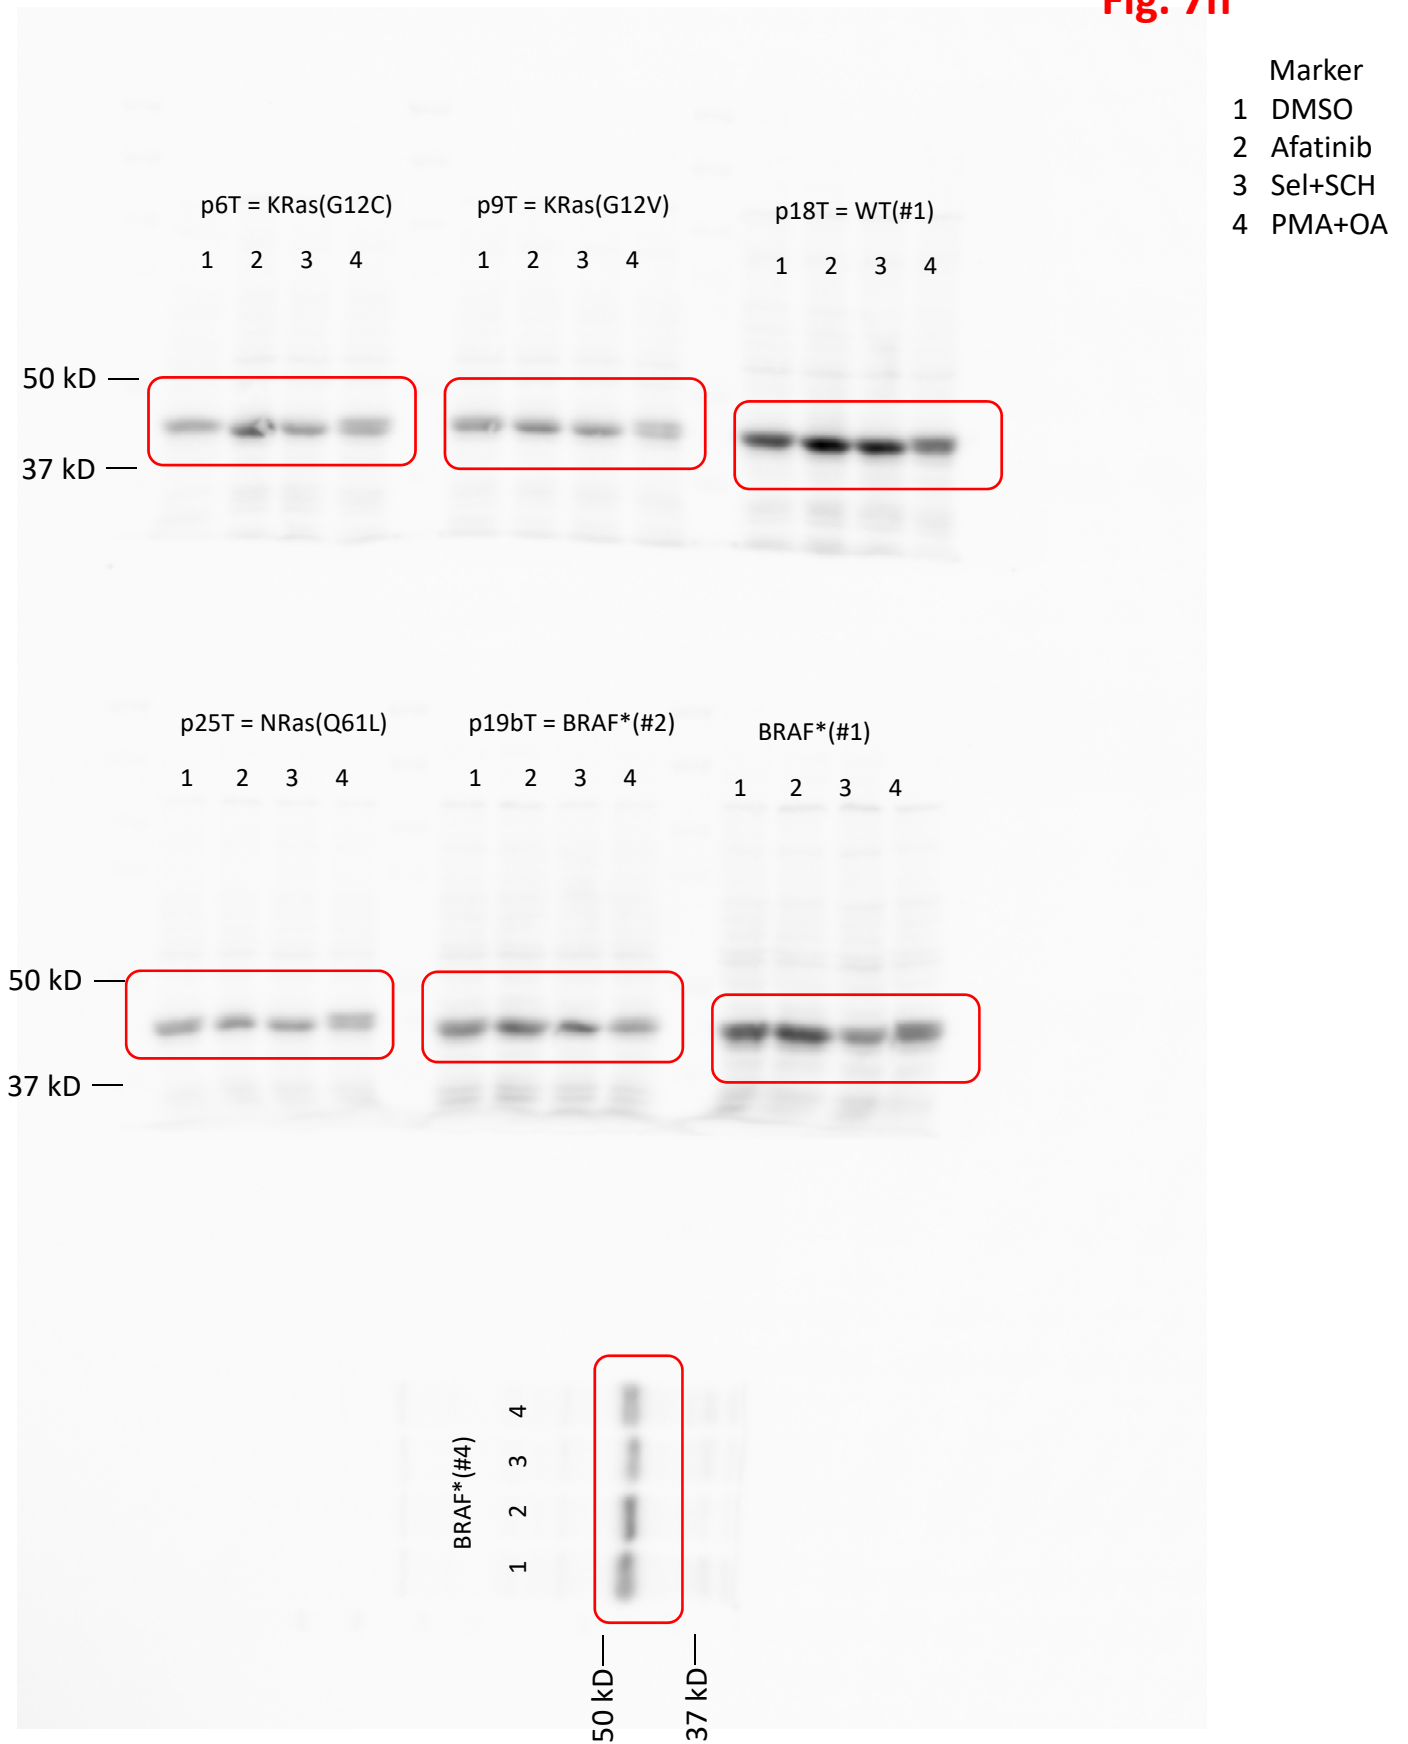

RAW blots (as scanned)

total MEK

Extended Data  
Fig. 7h

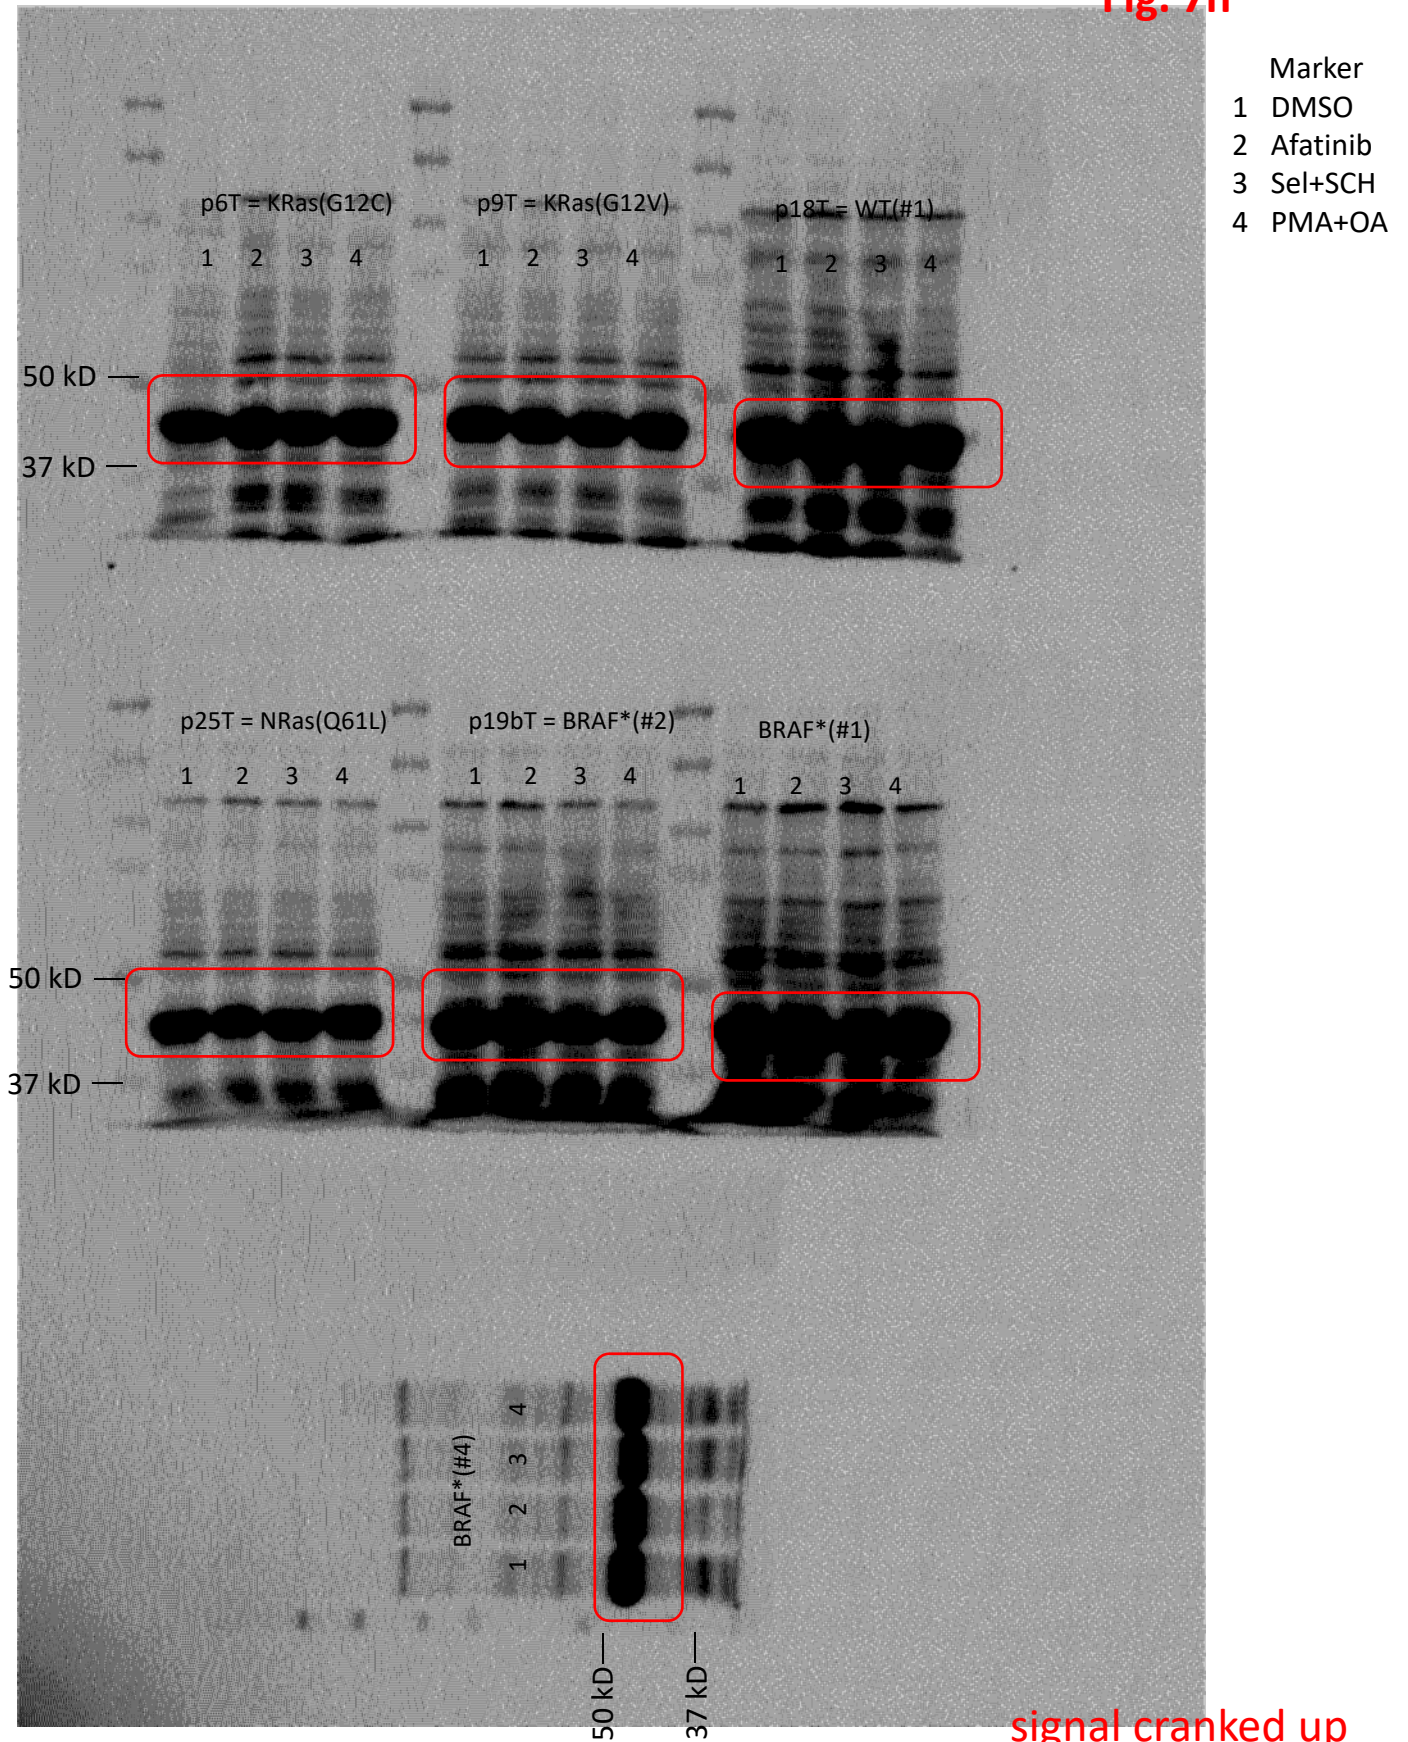



RAW blots (as scanned)

phospho-ERK

Extended Data  
Fig. 7h

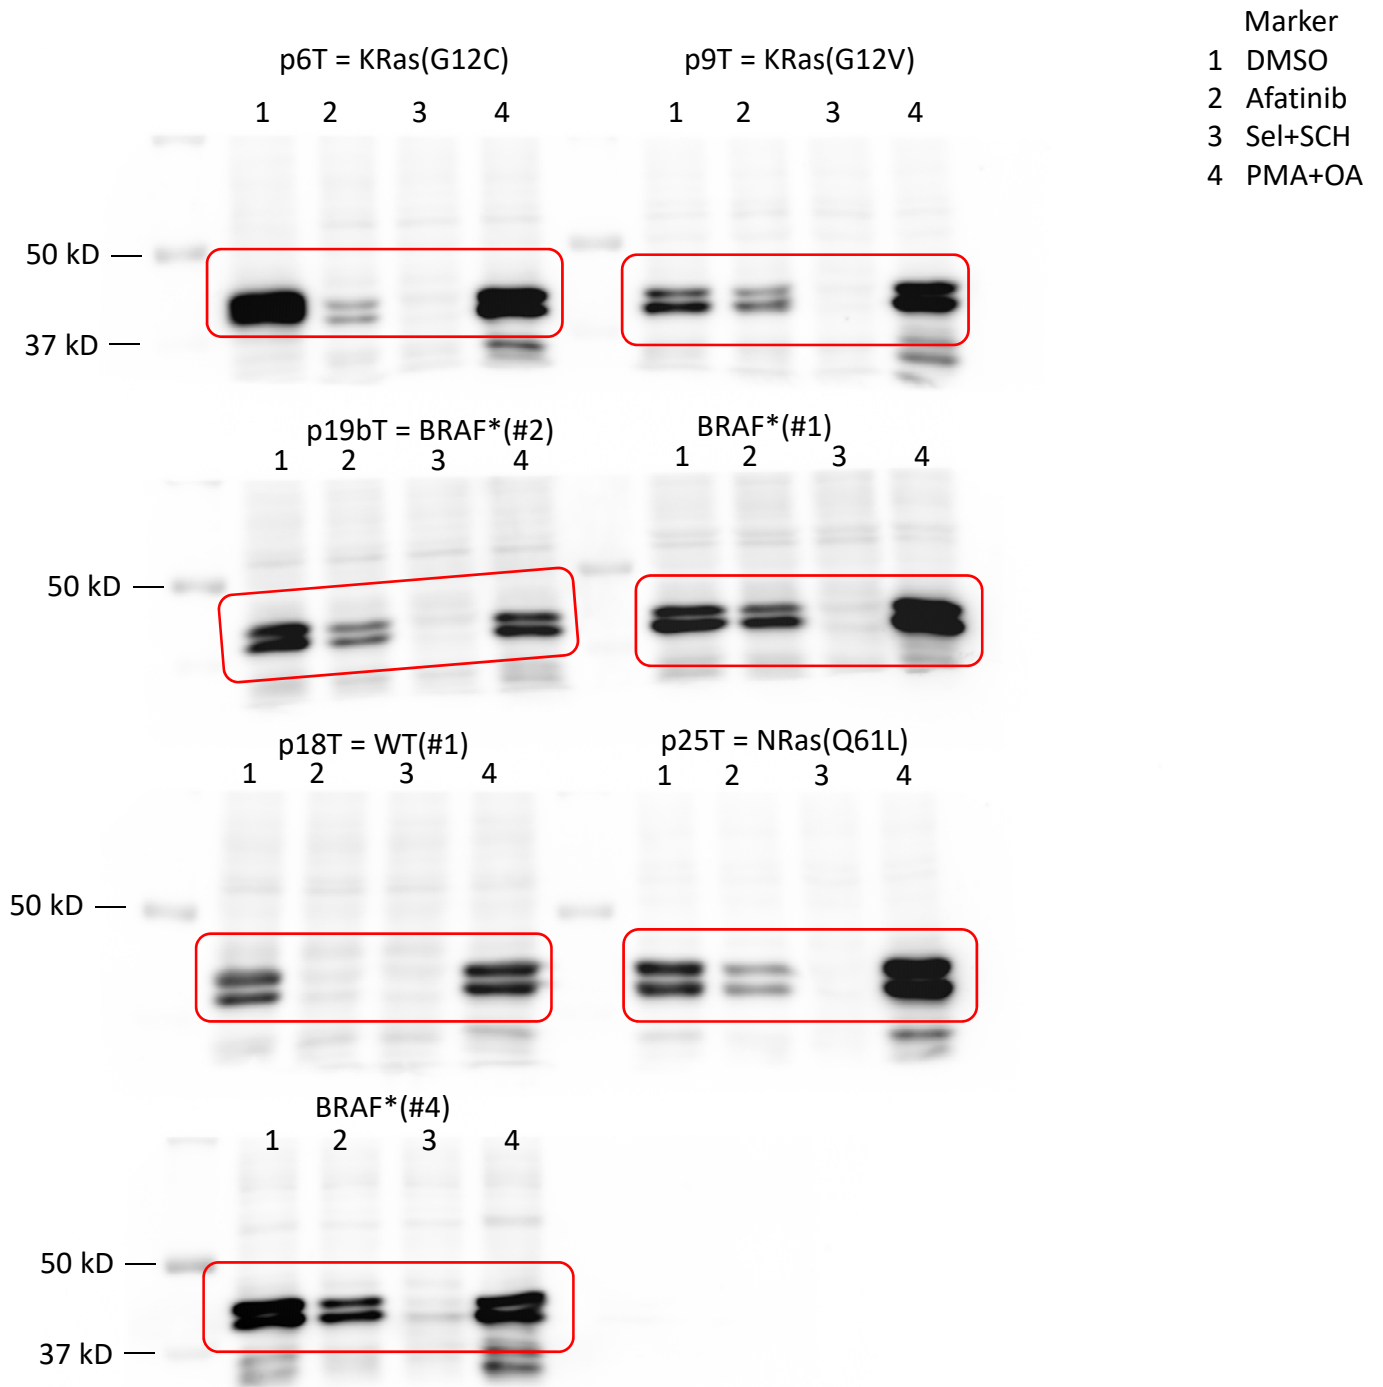

RAW blots (as scanned)

phospho-ERK

Extended Data  
Fig. 7h

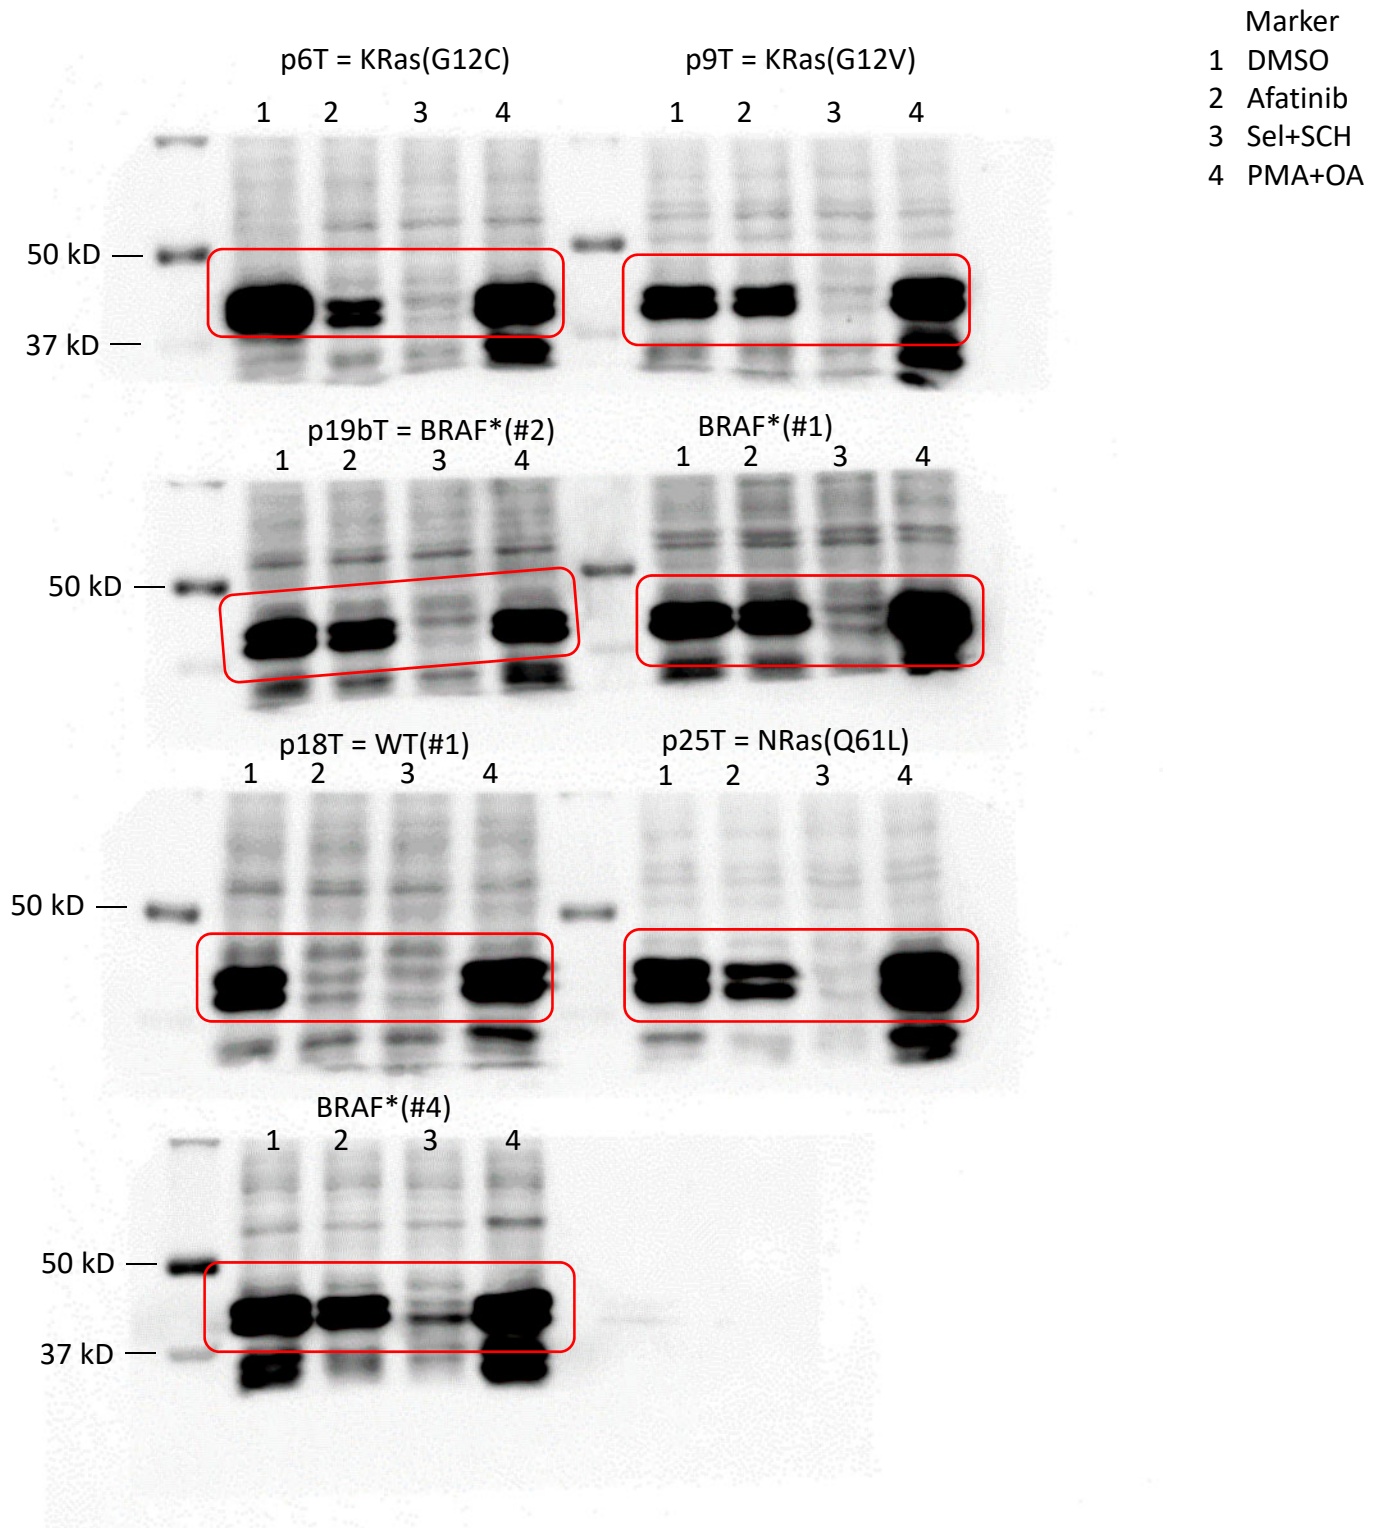

signal cranked up

RAW blots (as scanned)

total ERK

**Extended Data  
Fig. 7h**

- Marker
- 1 DMSO
  - 2 Afatinib
  - 3 Sel+SCH
  - 4 PMA+OA

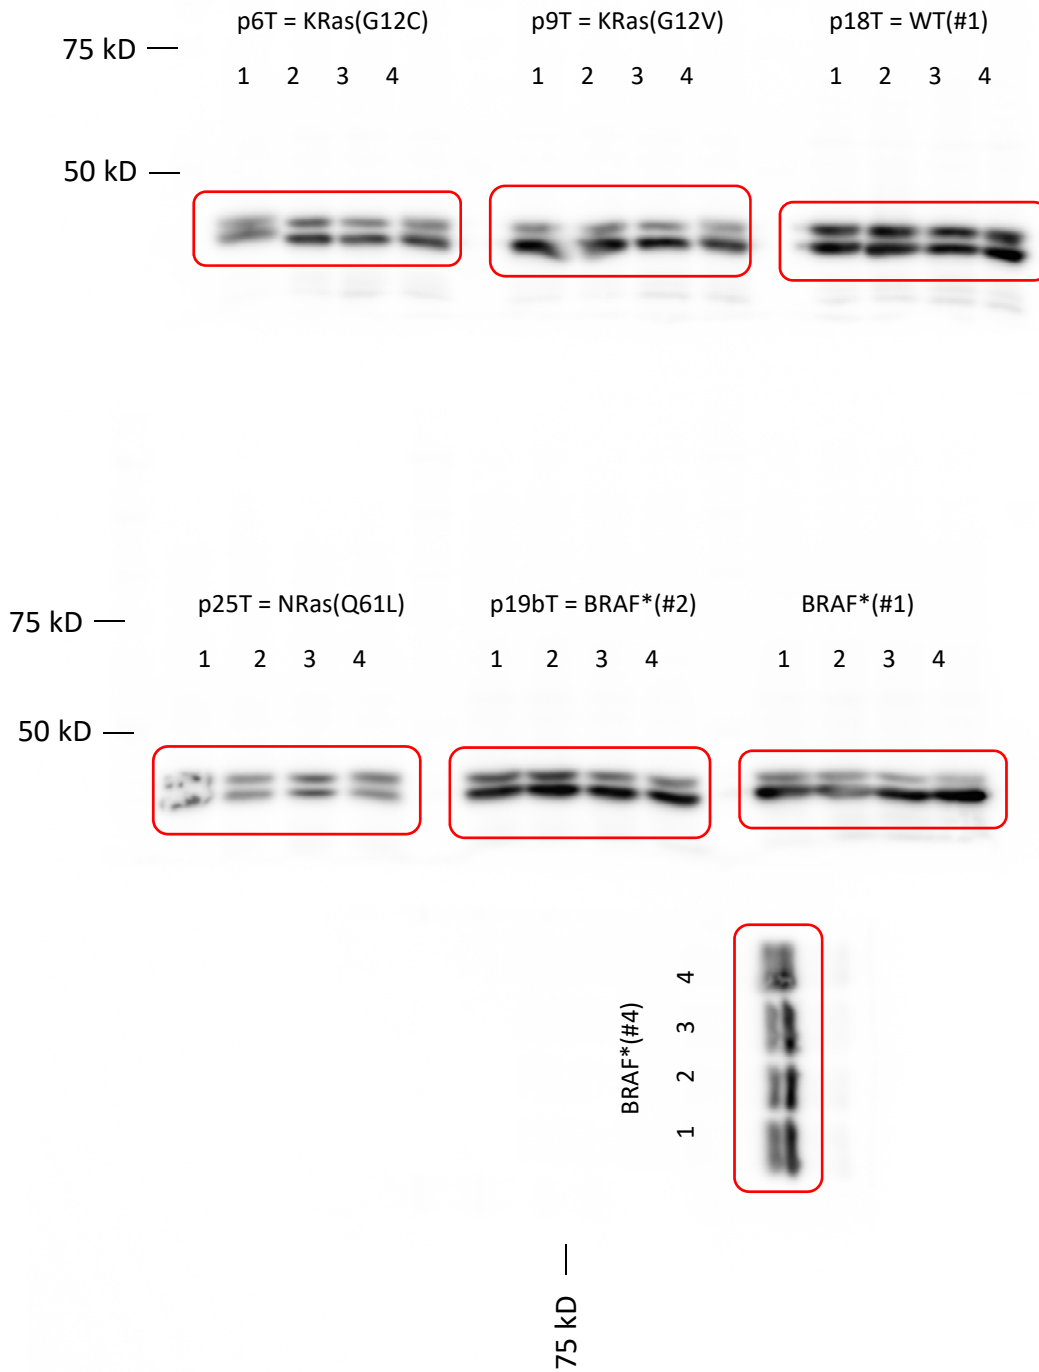

RAW blots (as scanned)

total ERK

Extended Data  
Fig. 7h

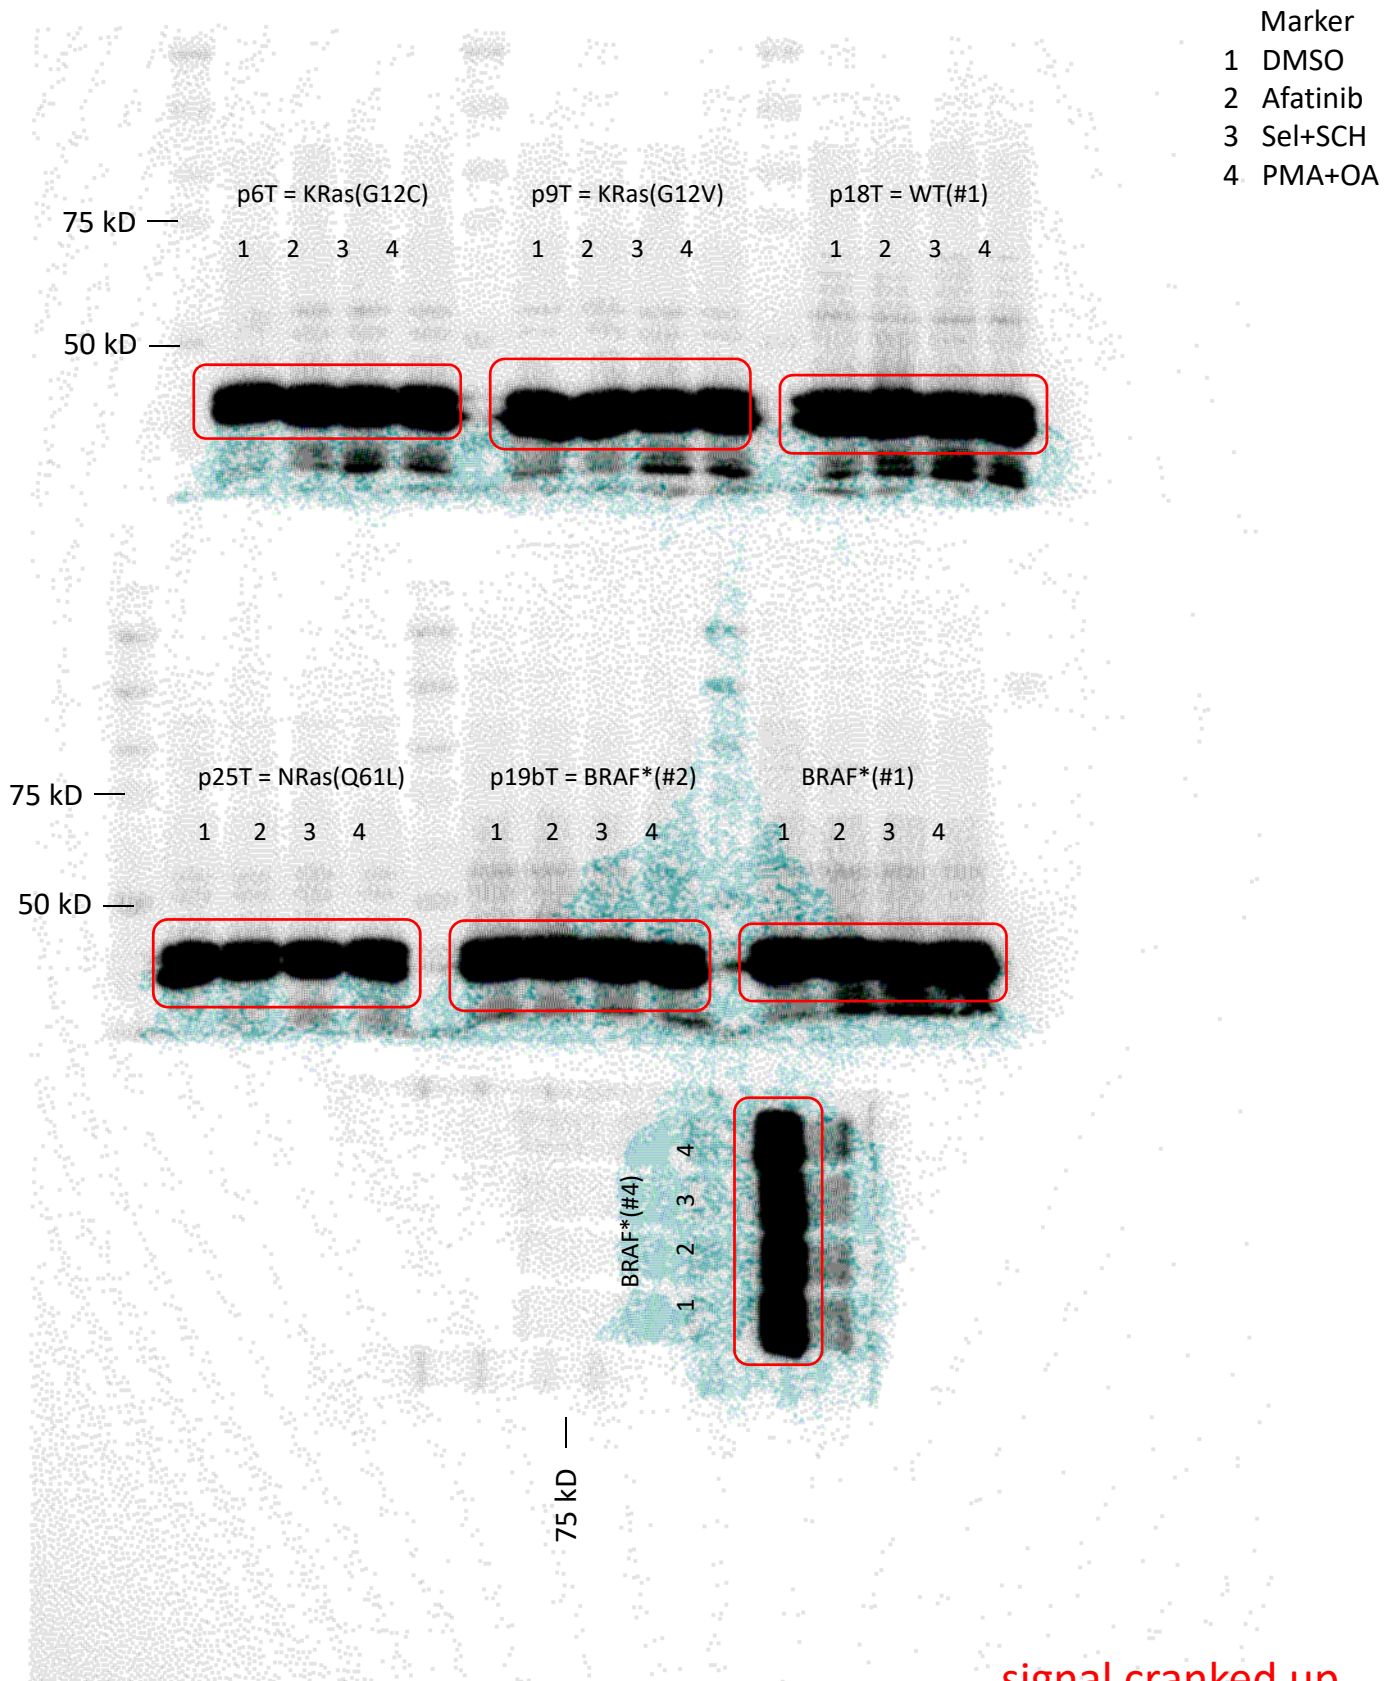

RAW blots (as scanned)

Vinculin

Extended Data  
Fig. 7h

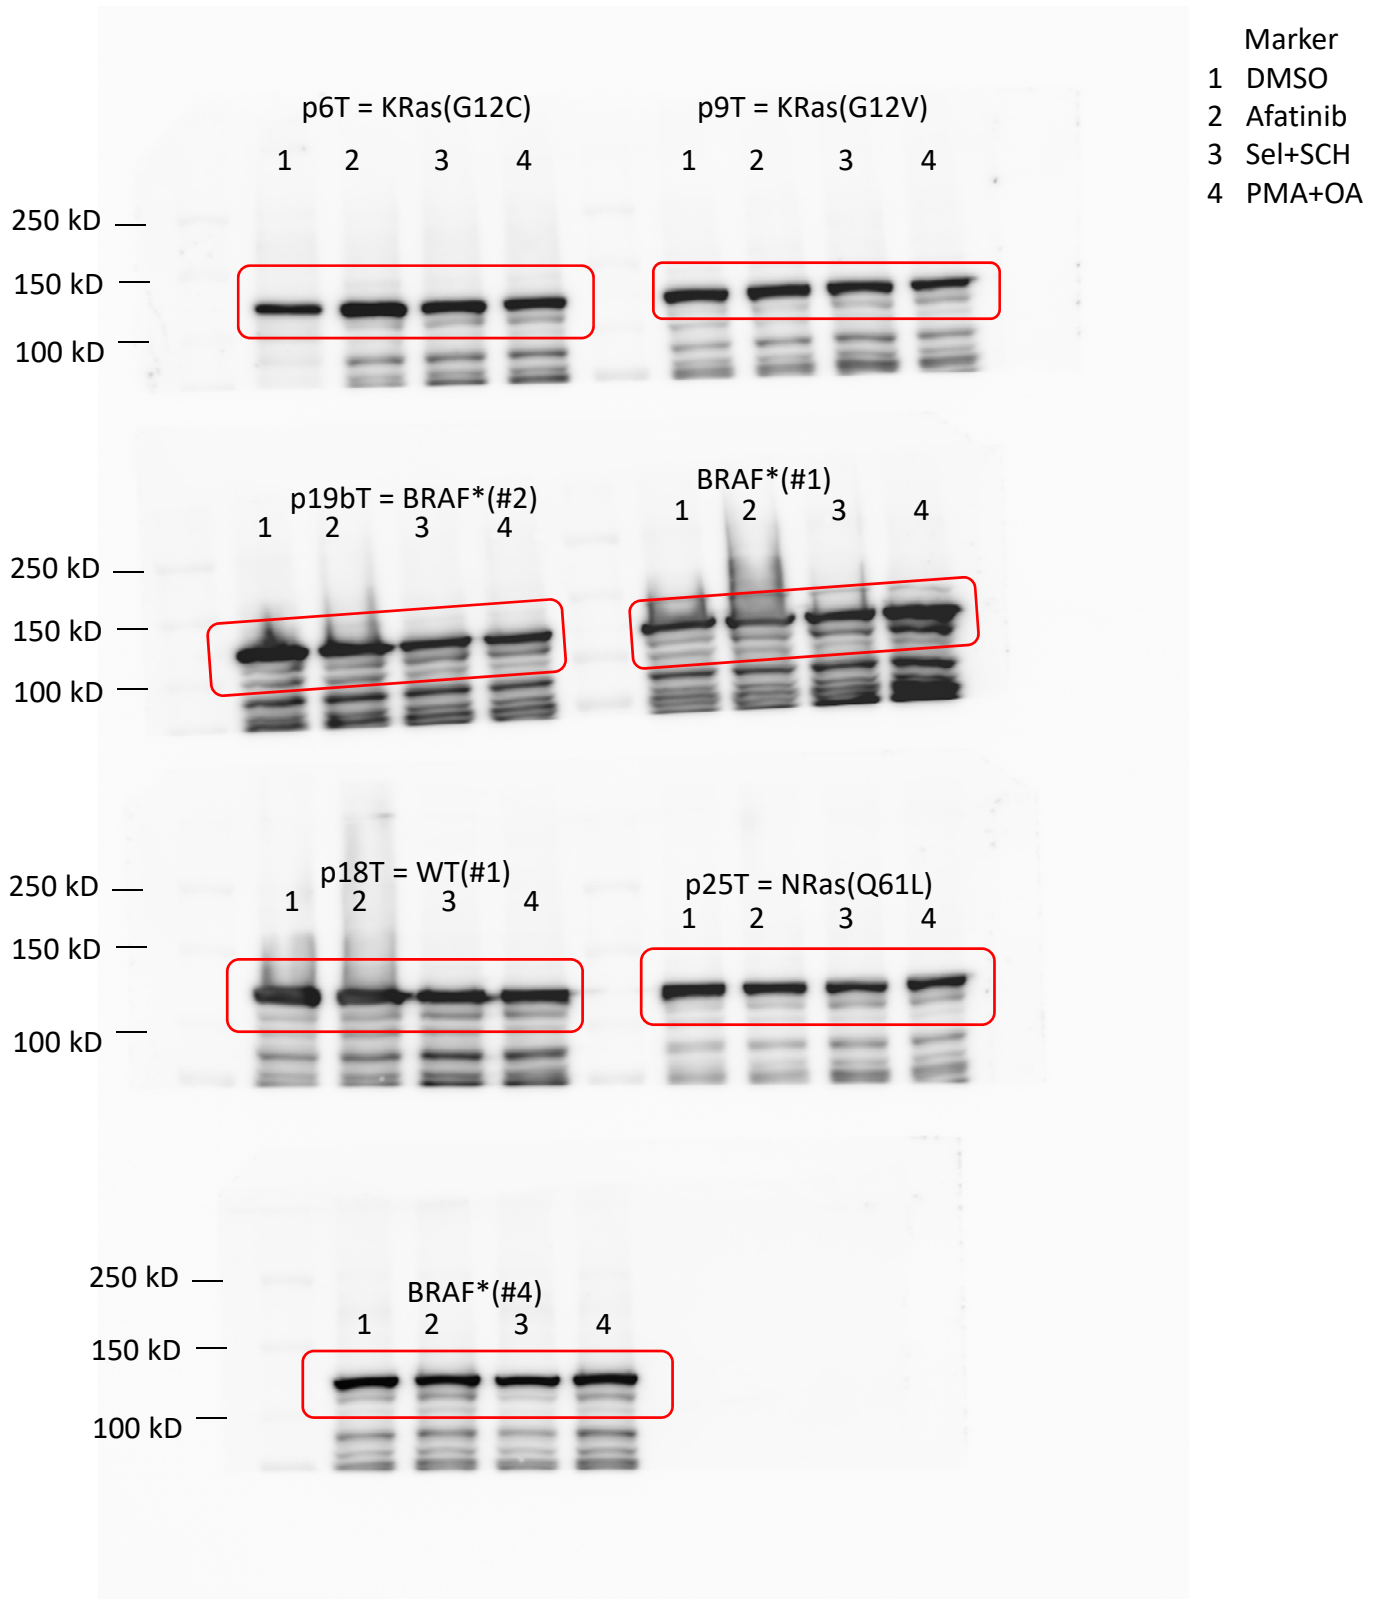

RAW blots (as scanned)

Vinculin

Extended Data  
Fig. 7h

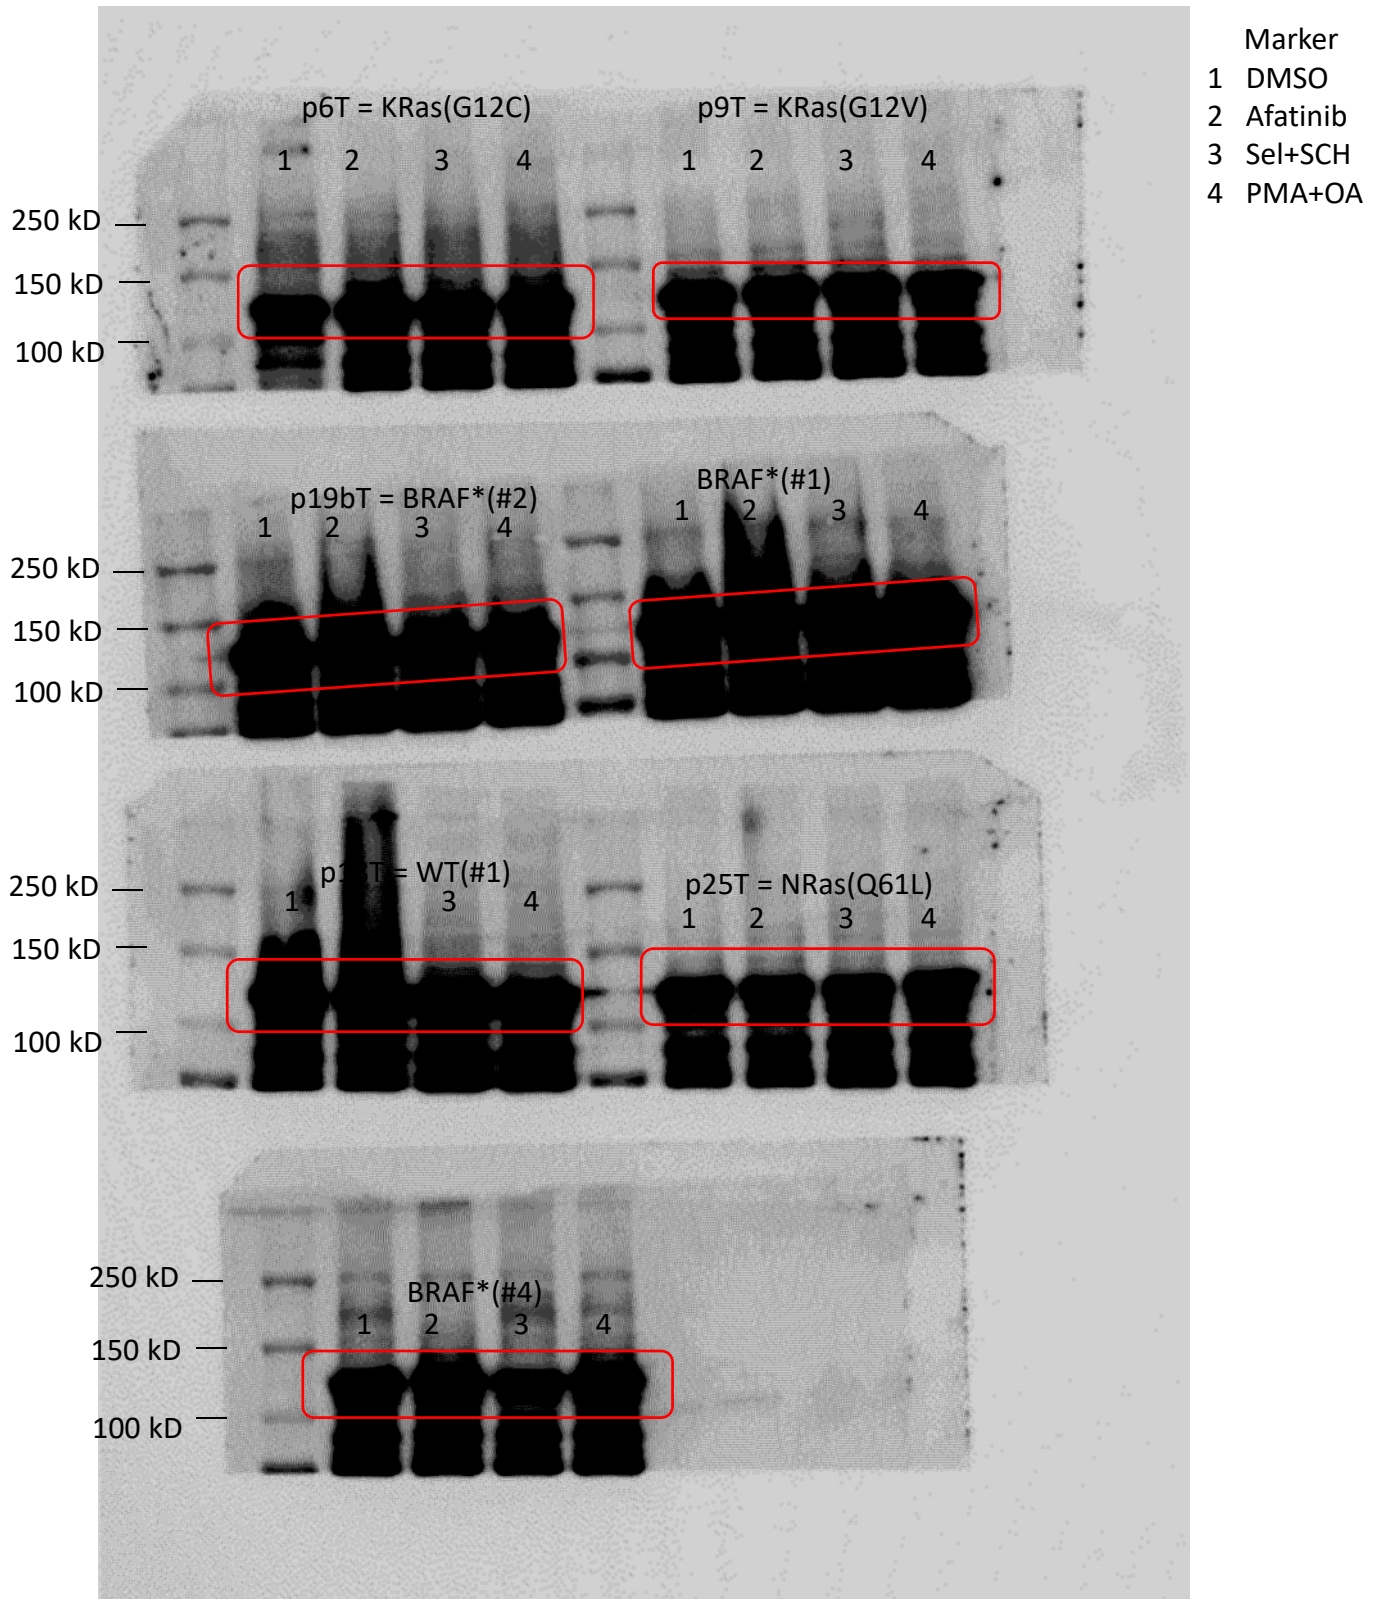

signal cranked up
