# Supplementary material
Source: PubMed Central journal article supplement (PMC7610573)
Supplement: EMS118801-supplement-Western_Blot_Raw_Data_Fig_6.pdf [file EMS118801-supplement-Western_Blot_Raw_Data_Fig_6.pdf]

**Fig. 6d**  
**JBP**

RAW blots (as scanned)

p-ERK

**Fig. 6d**  
**(HUB040 , HUB075, p25T)**

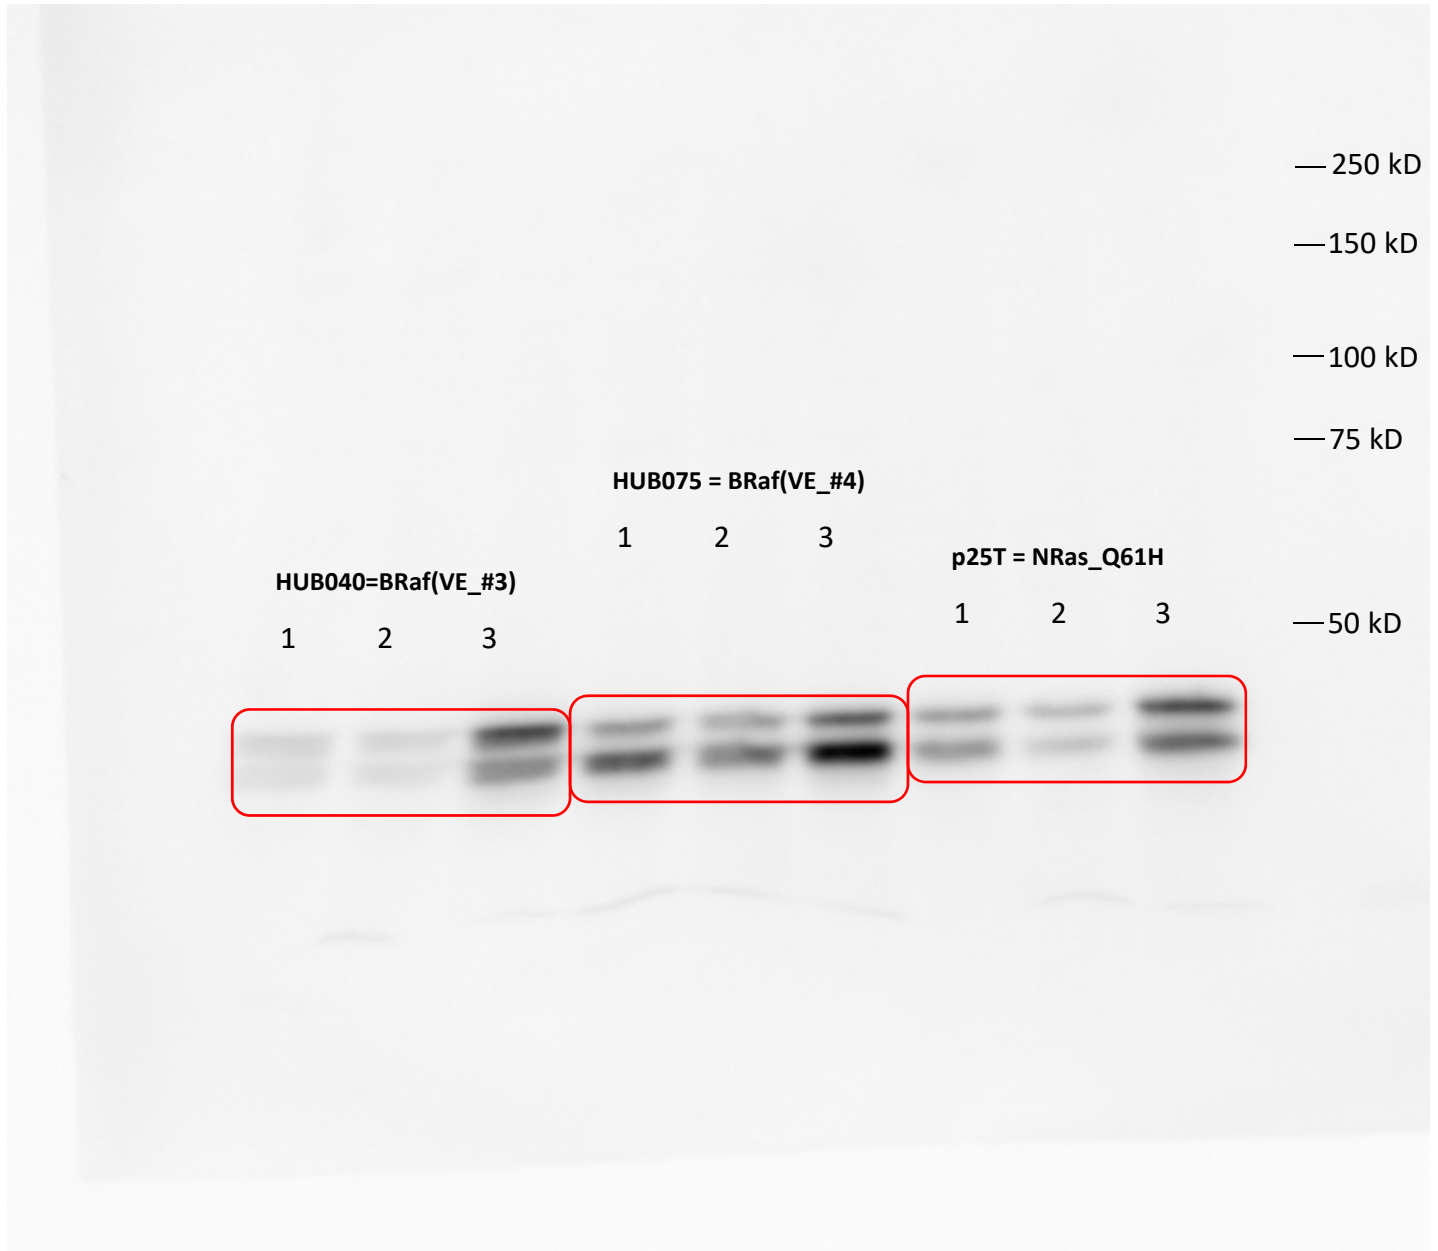

- 1 no\_EGF
- 2 low\_EGF
- 3 normal\_EGF

RAW blots (as scanned)

p-ERK

**Fig. 6d**  
**(HUB040 , HUB075, p25T)**

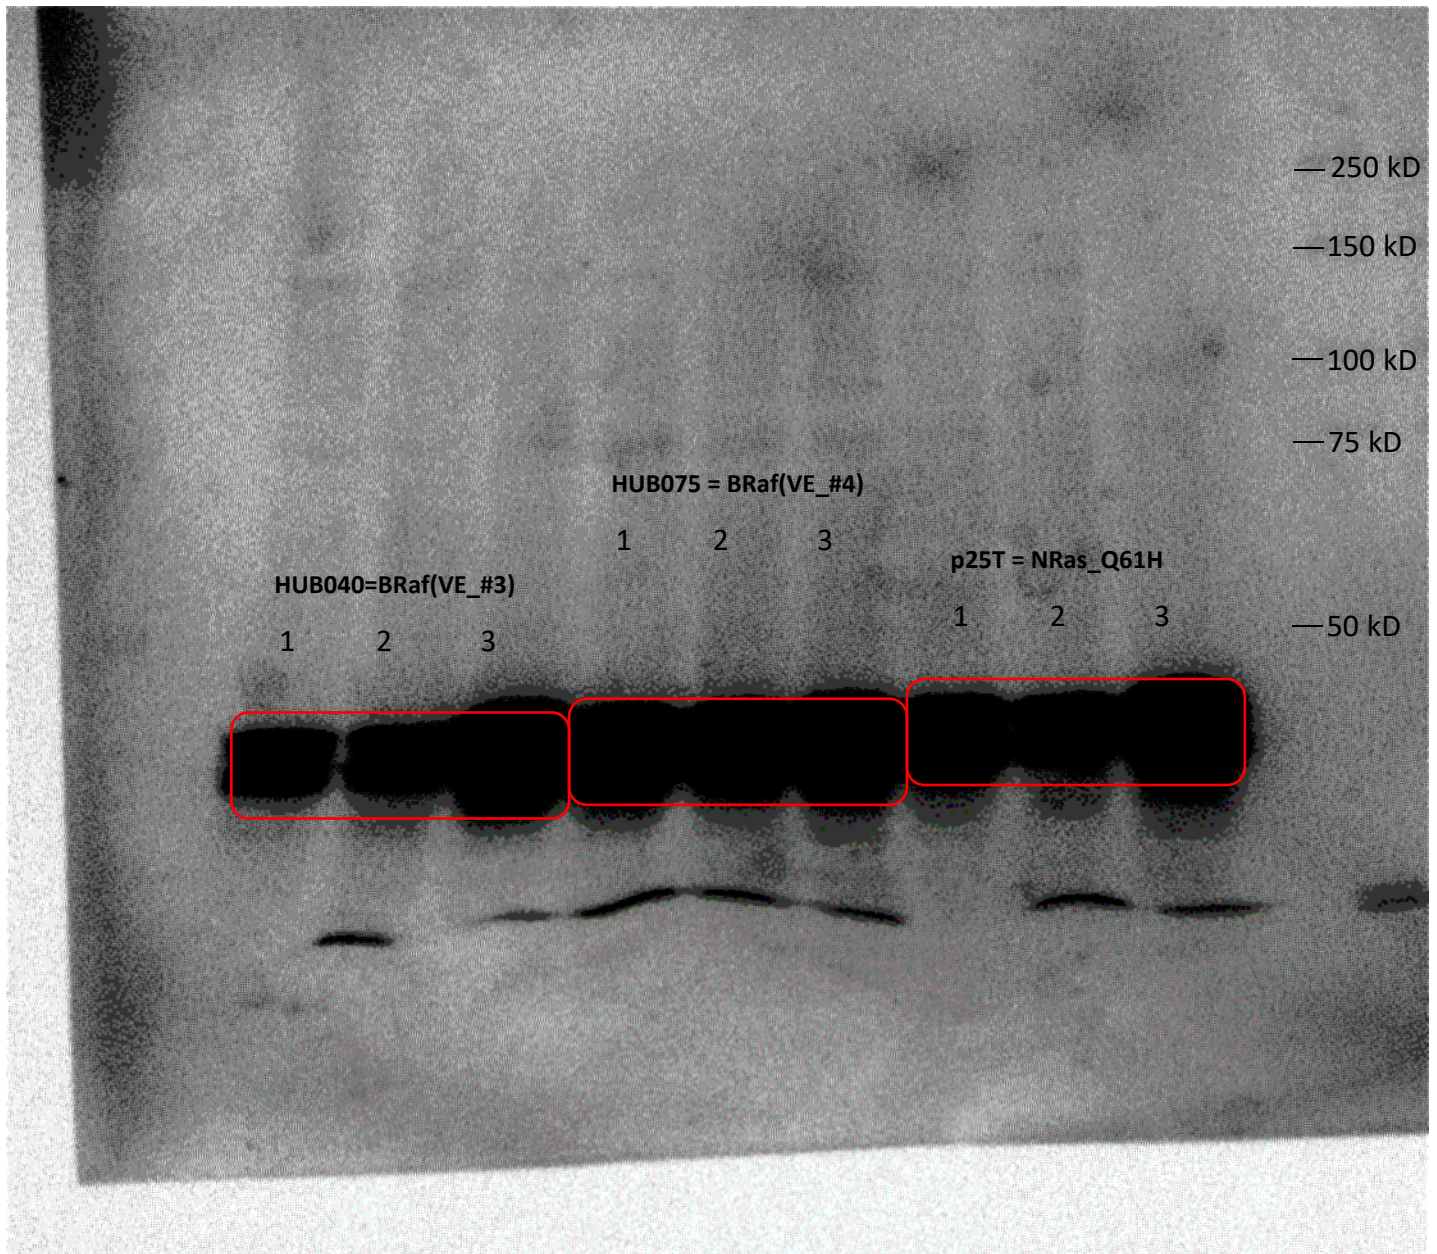

- 1 no\_EGF
- 2 low\_EGF
- 3 normal\_EGF

signal cranked up

RAW blots (as scanned)

total ERK

**Fig. 6d**  
**(HUB040 , HUB075, p25T)**

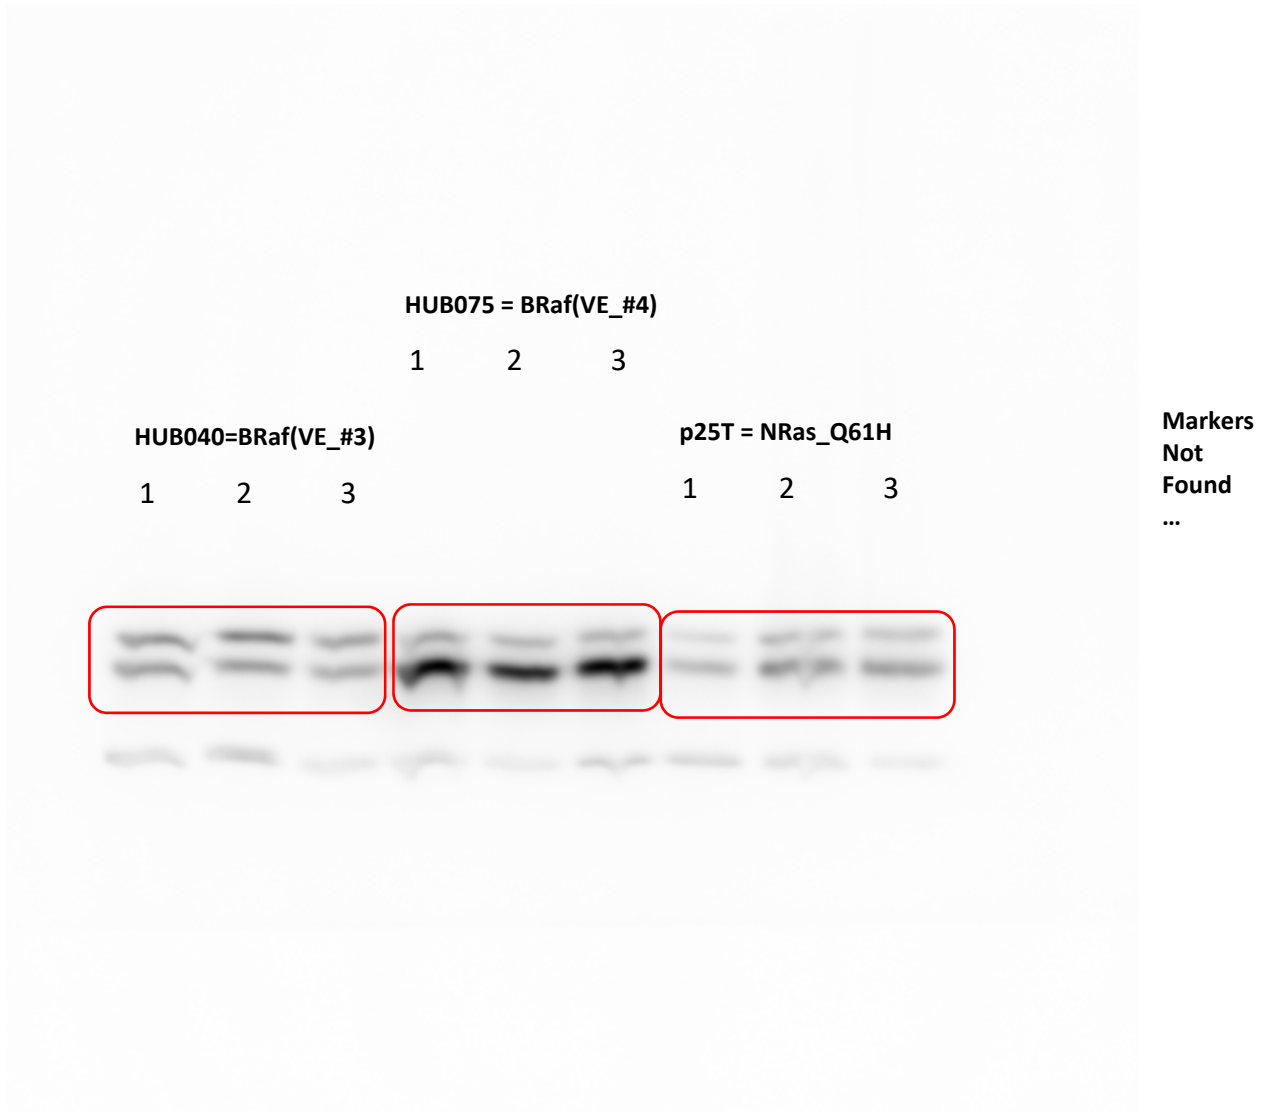

- 1 no\_EGF
- 2 low\_EGF
- 3 normal\_EGF

RAW blots (as scanned)

total ERK

**Fig. 6d**  
**(HUB040 , HUB075, p25T)**

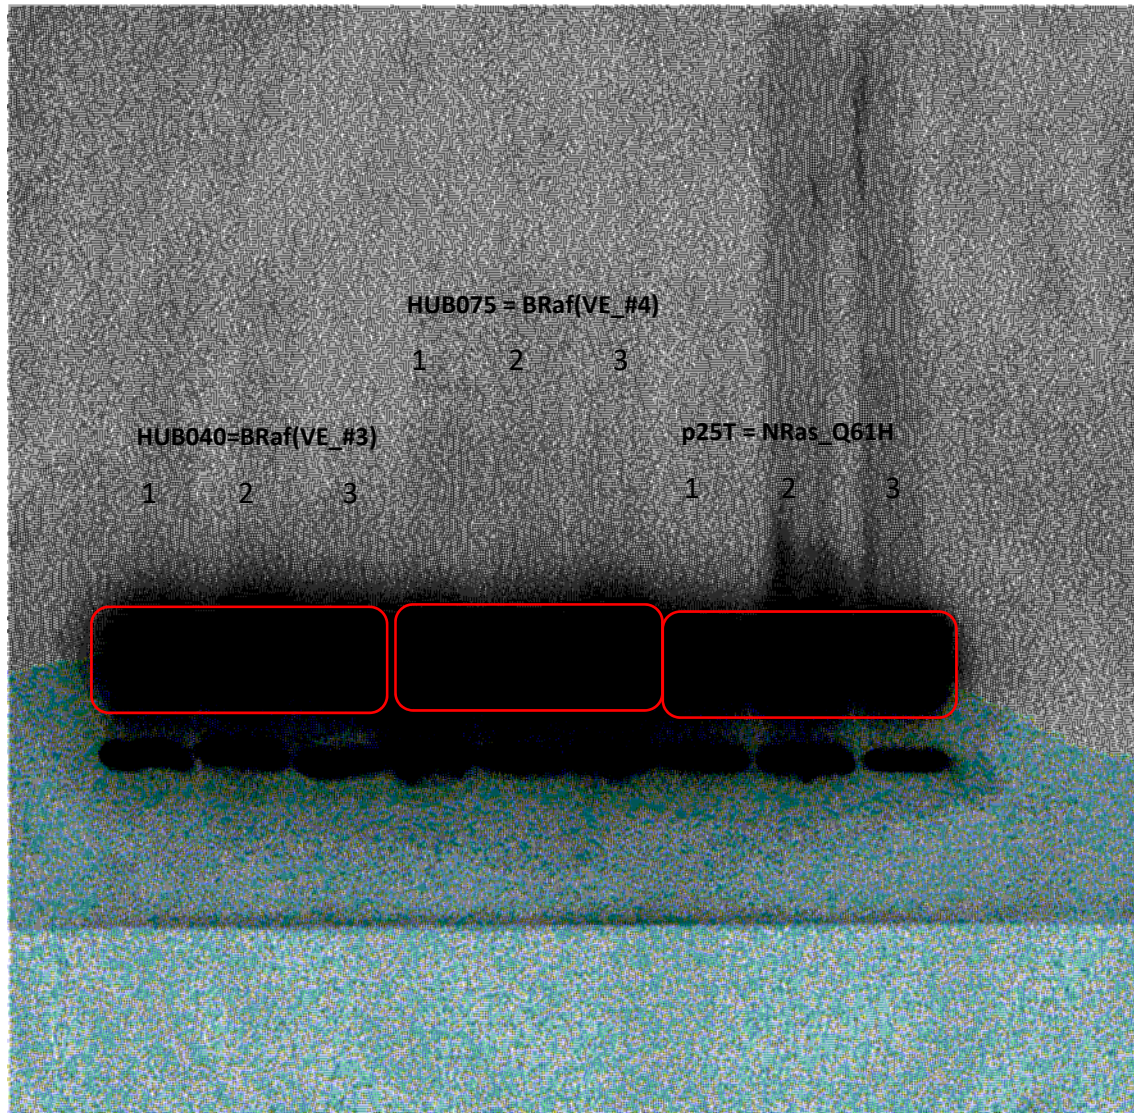

- 1 no\_EGF
- 2 low\_EGF
- 3 normal\_EGF

signal cranked up

RAW blots (as scanned)

Vinculin

**Fig. 6d**  
**(HUB040 , HUB075, p25T)**

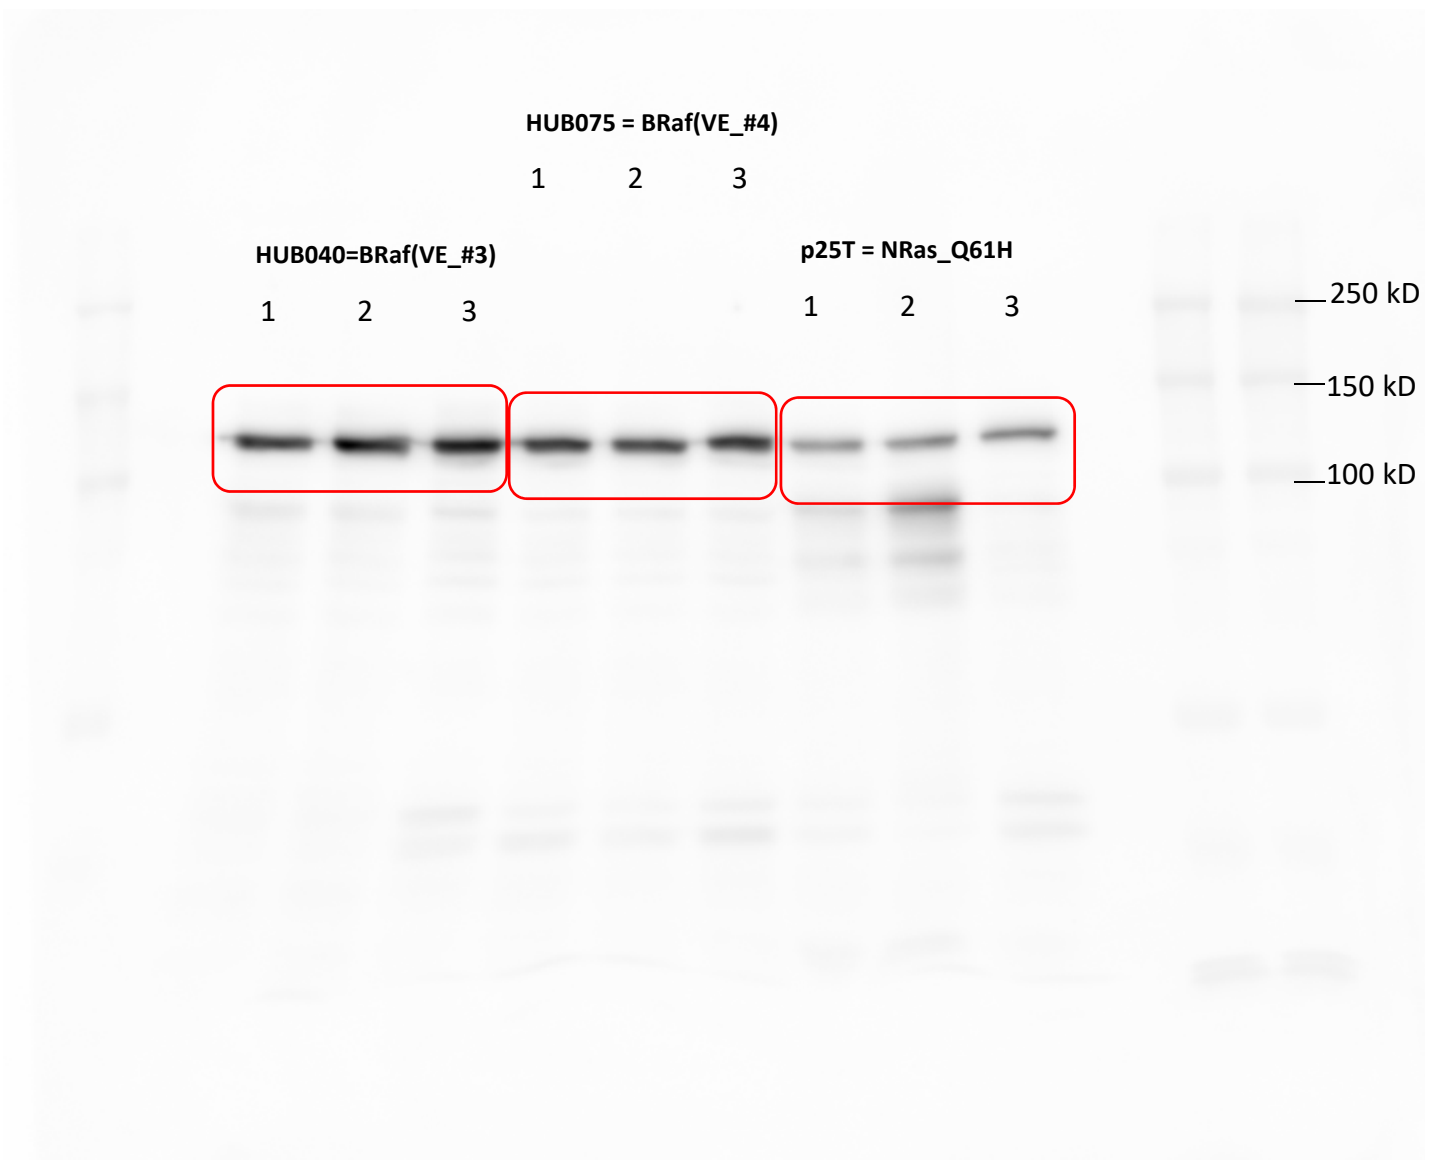

- 1 no\_EGF
- 2 low\_EGF
- 3 normal\_EGF

RAW blots (as scanned)

Vinculin

**Fig. 6d**  
**(HUB040 , HUB075, p25T)**

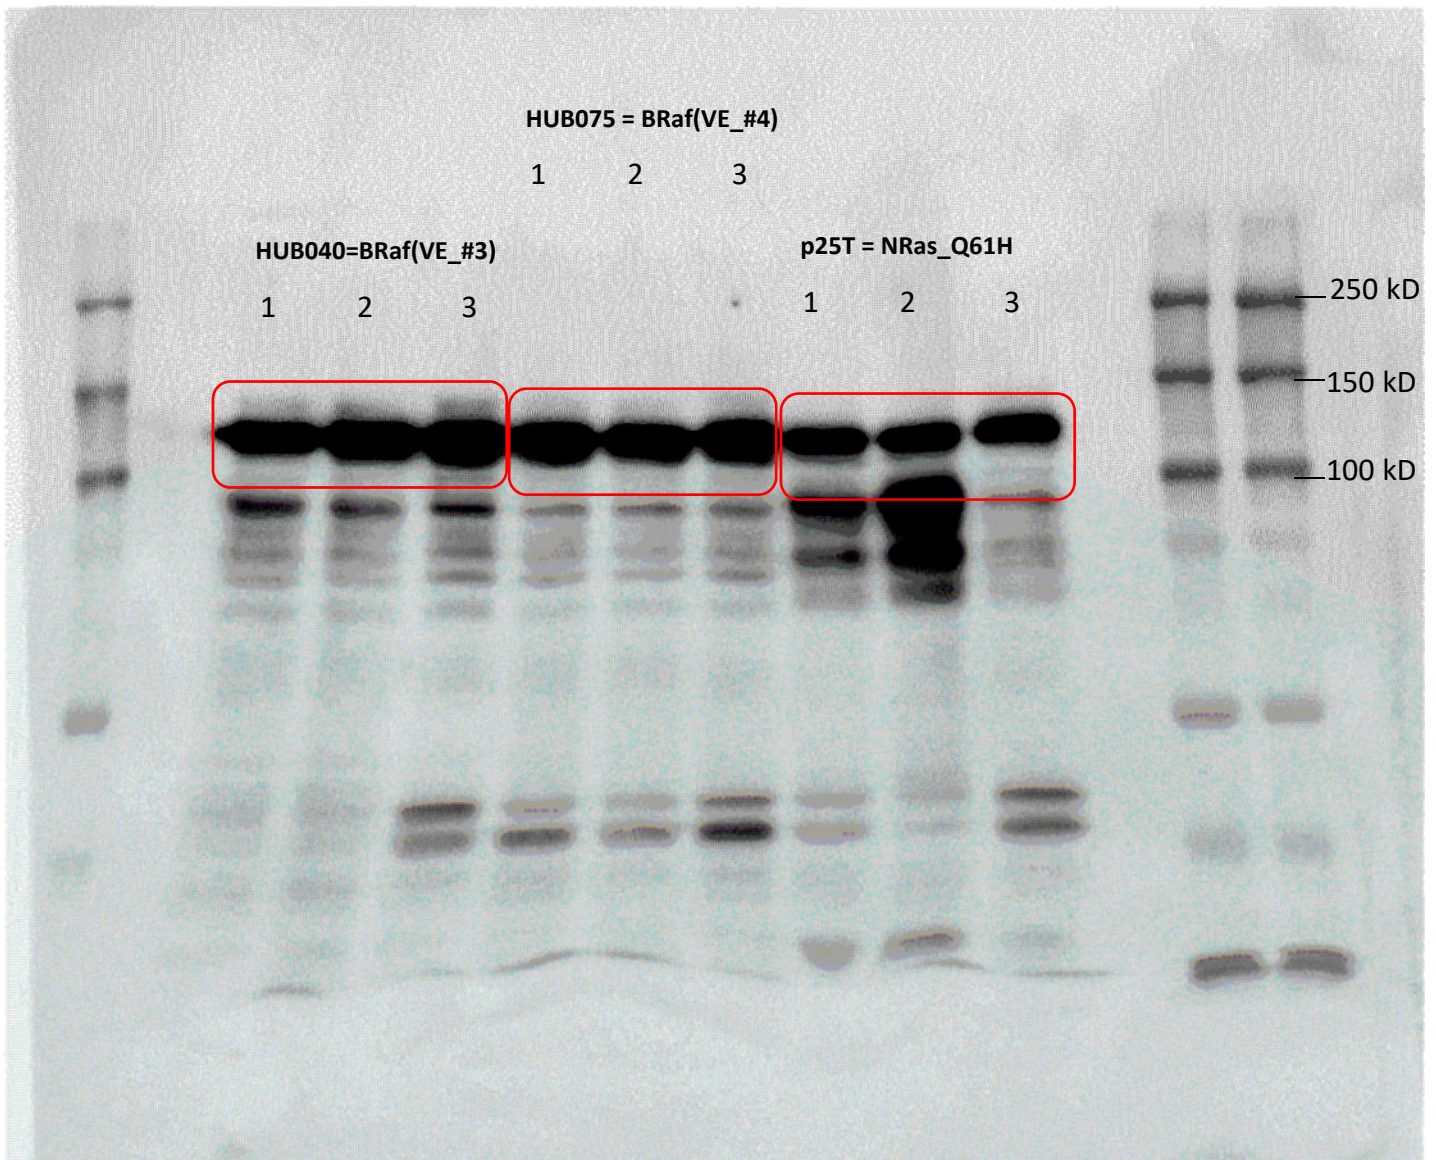

- 1 no\_EGF
- 2 low\_EGF
- 3 normal\_EGF

signal cranked up

RAW blots (as scanned)

p-ERK

Fig. 6d  
p6T , p9T

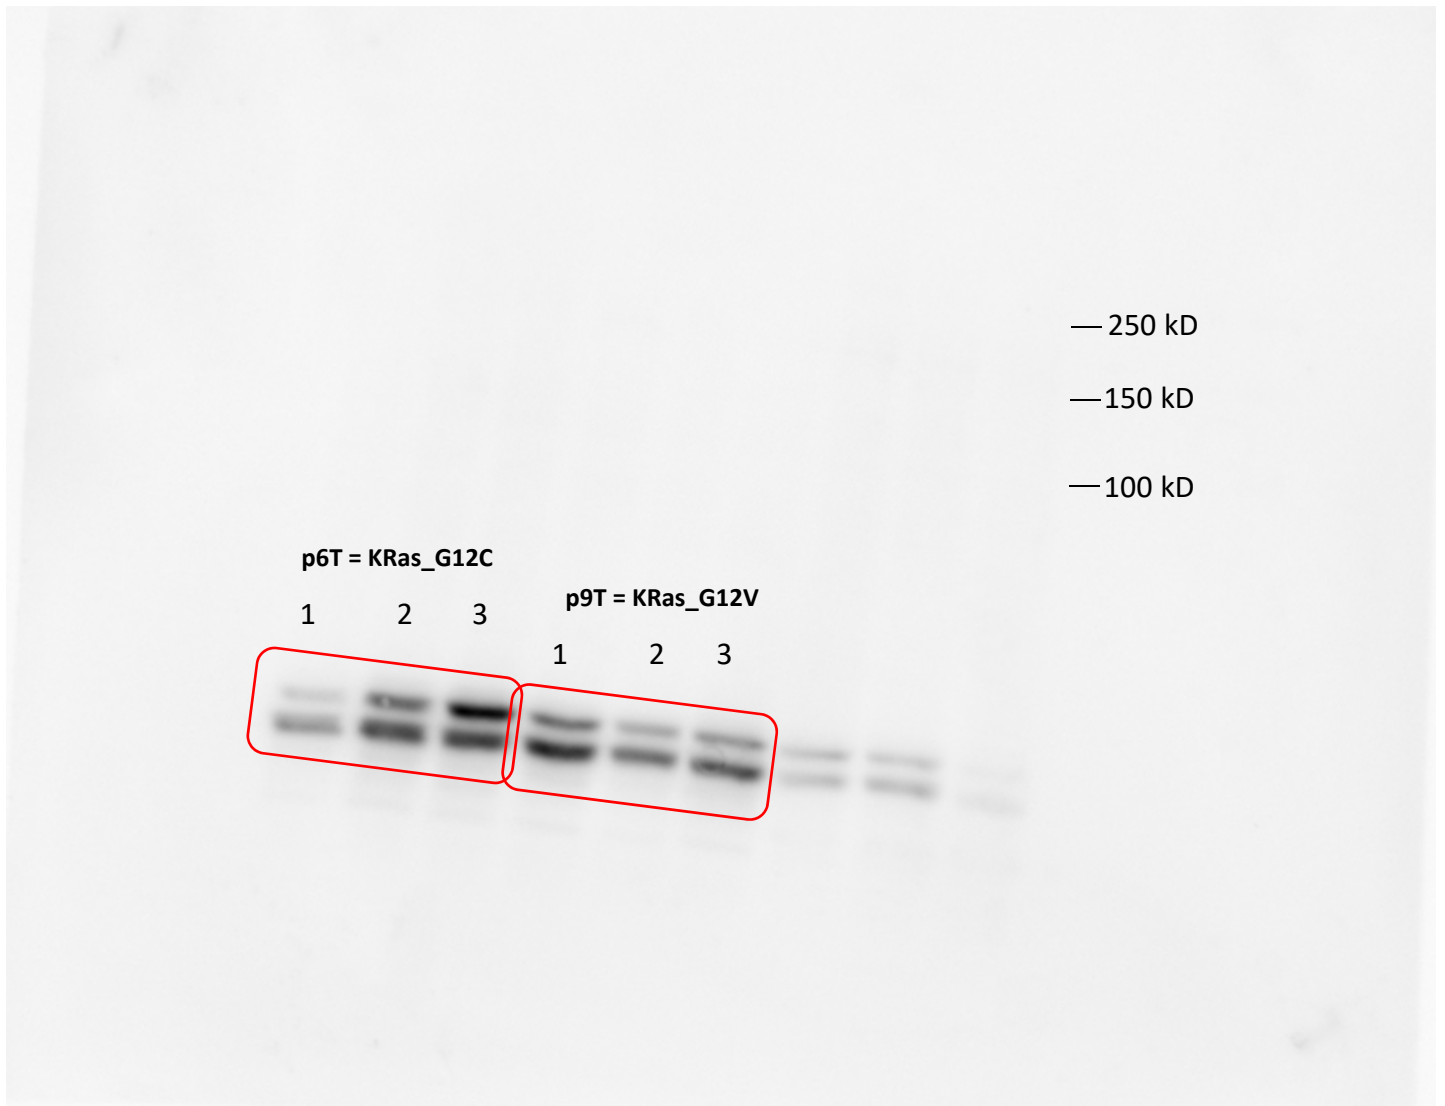

- 1 no\_EGF
- 2 low\_EGF
- 3 normal\_EGF



RAW blots (as scanned)

p-ERK

Fig. 6d  
p6T , p9T

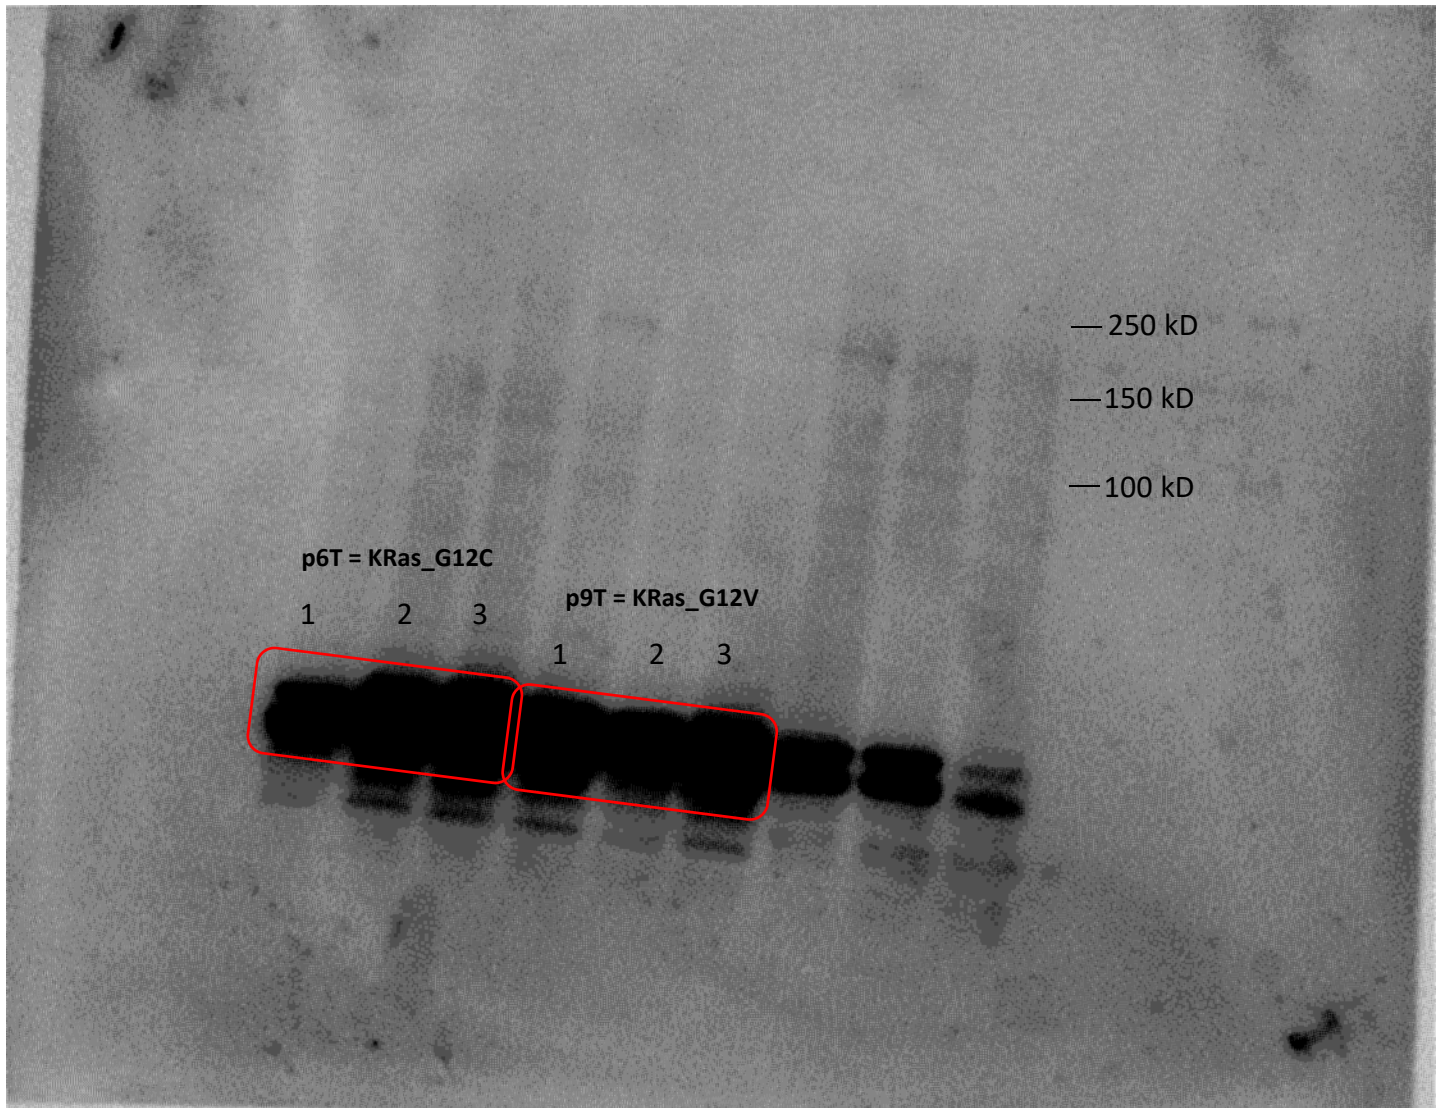

- 1 no\_EGF
- 2 low\_EGF
- 3 normal\_EGF

signal cranked up

RAW blots (as scanned)

total ERK

Fig. 6d  
p6T , p9T

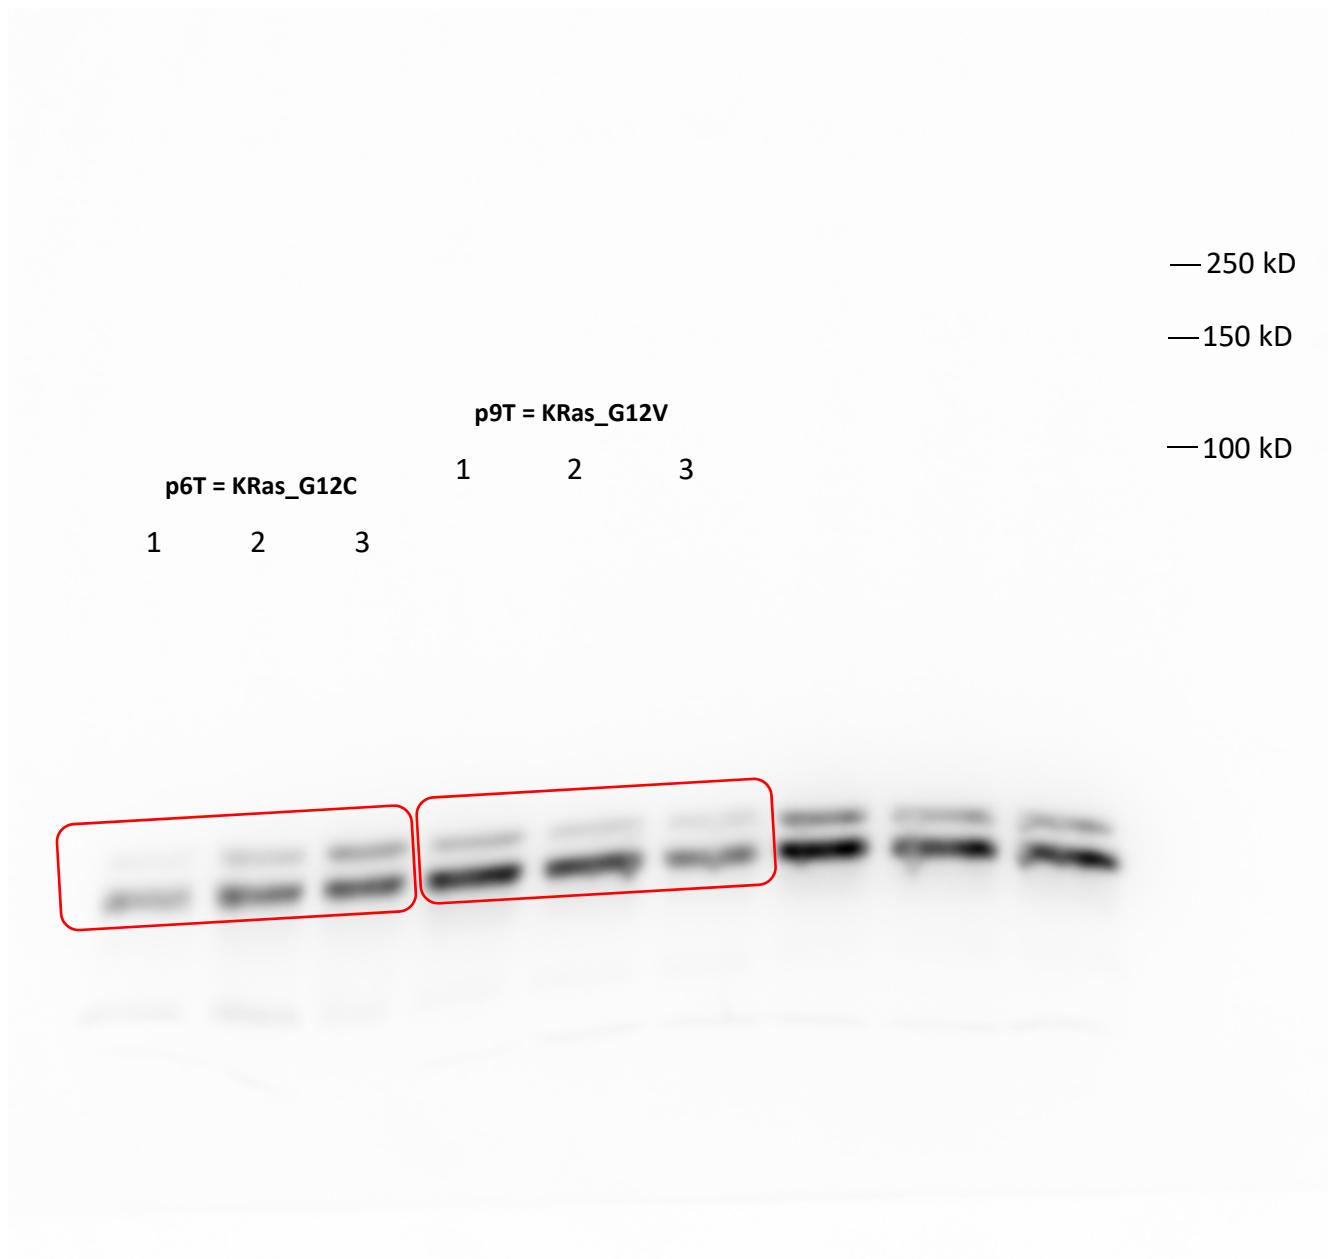

1 no\_EGF  
2 low\_EGF  
3 normal\_EGF

RAW blots (as scanned)

total ERK

Fig. 6d  
p6T , p9T

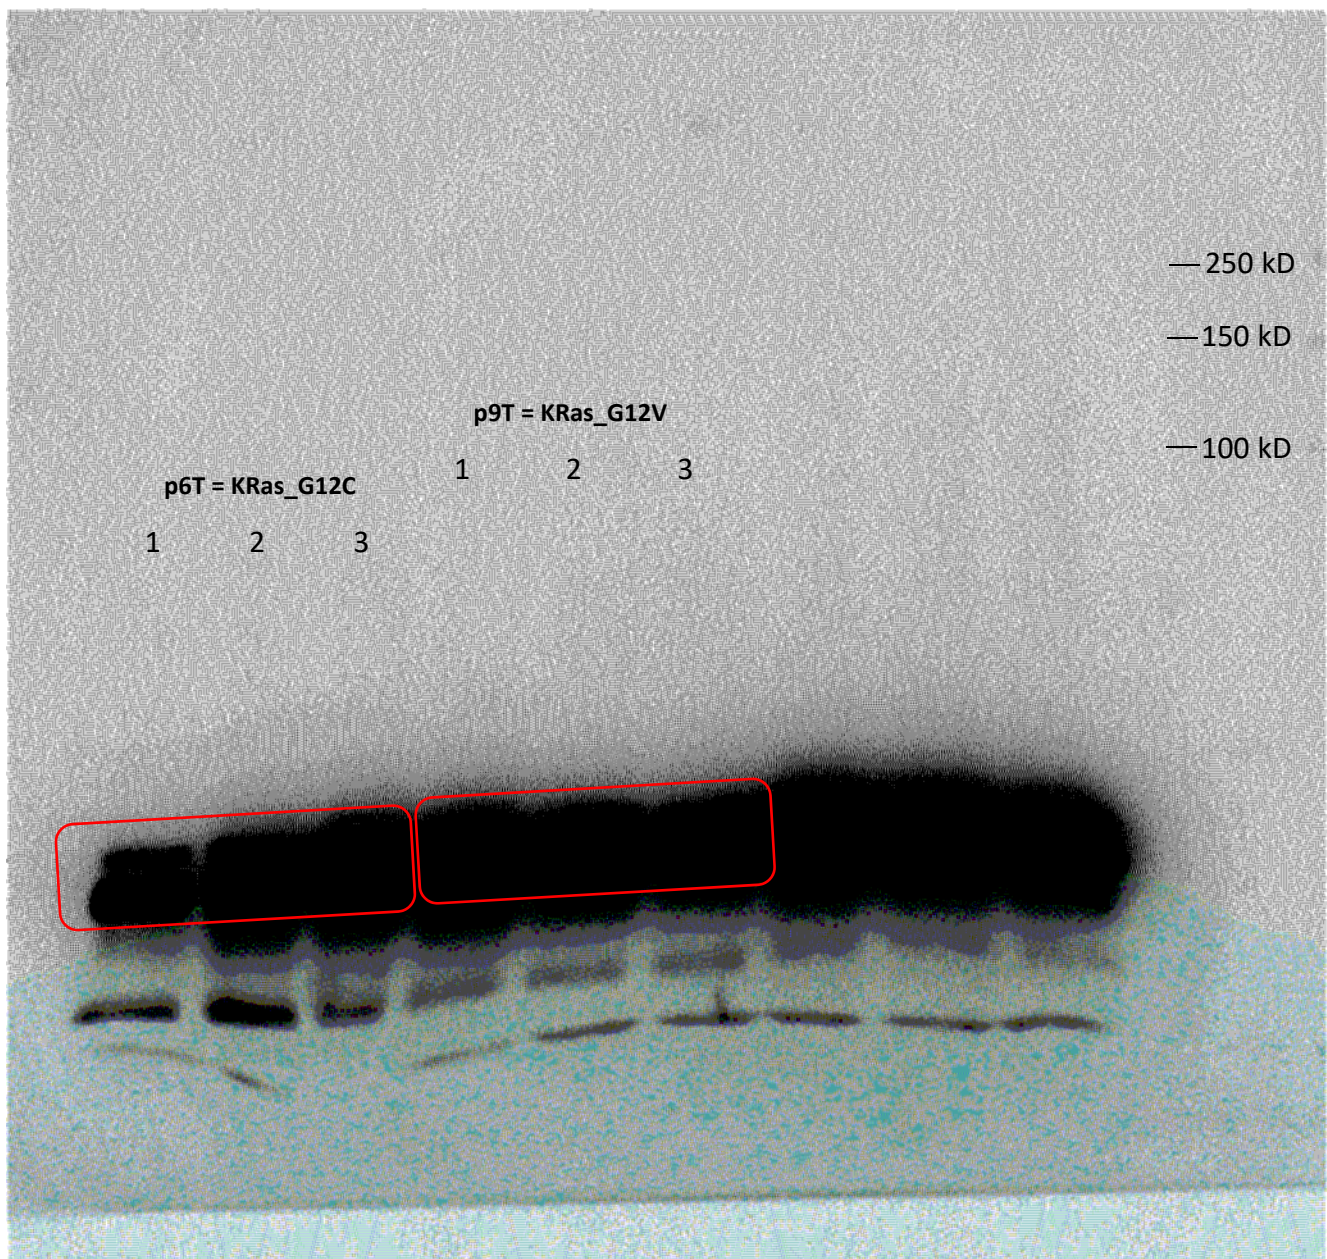

- 1 no\_EGF
- 2 low\_EGF
- 3 normal\_EGF

signal cranked up

RAW blots (as scanned)

Vinculin

Fig. 6d  
p6T , p9T

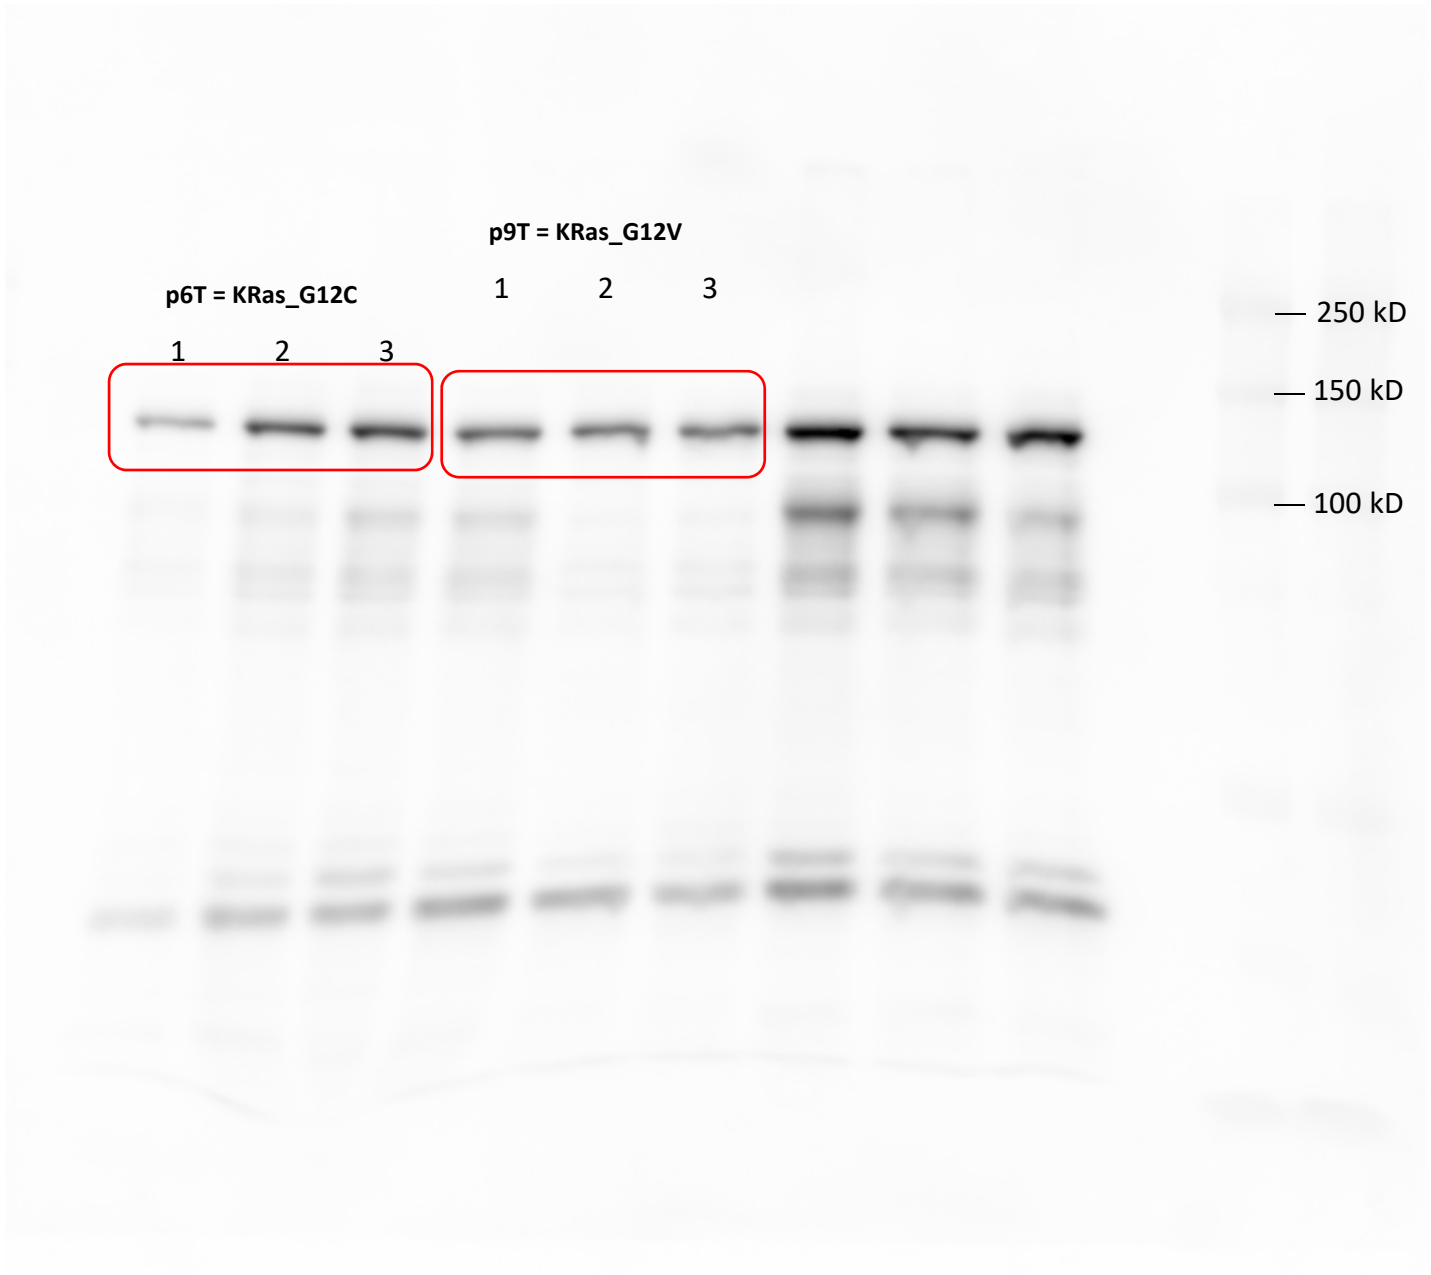

- 1 no\_EGF
- 2 low\_EGF
- 3 normal\_EGF

RAW blots (as scanned)

Vinculin

Fig. 6d  
p6T , p9T

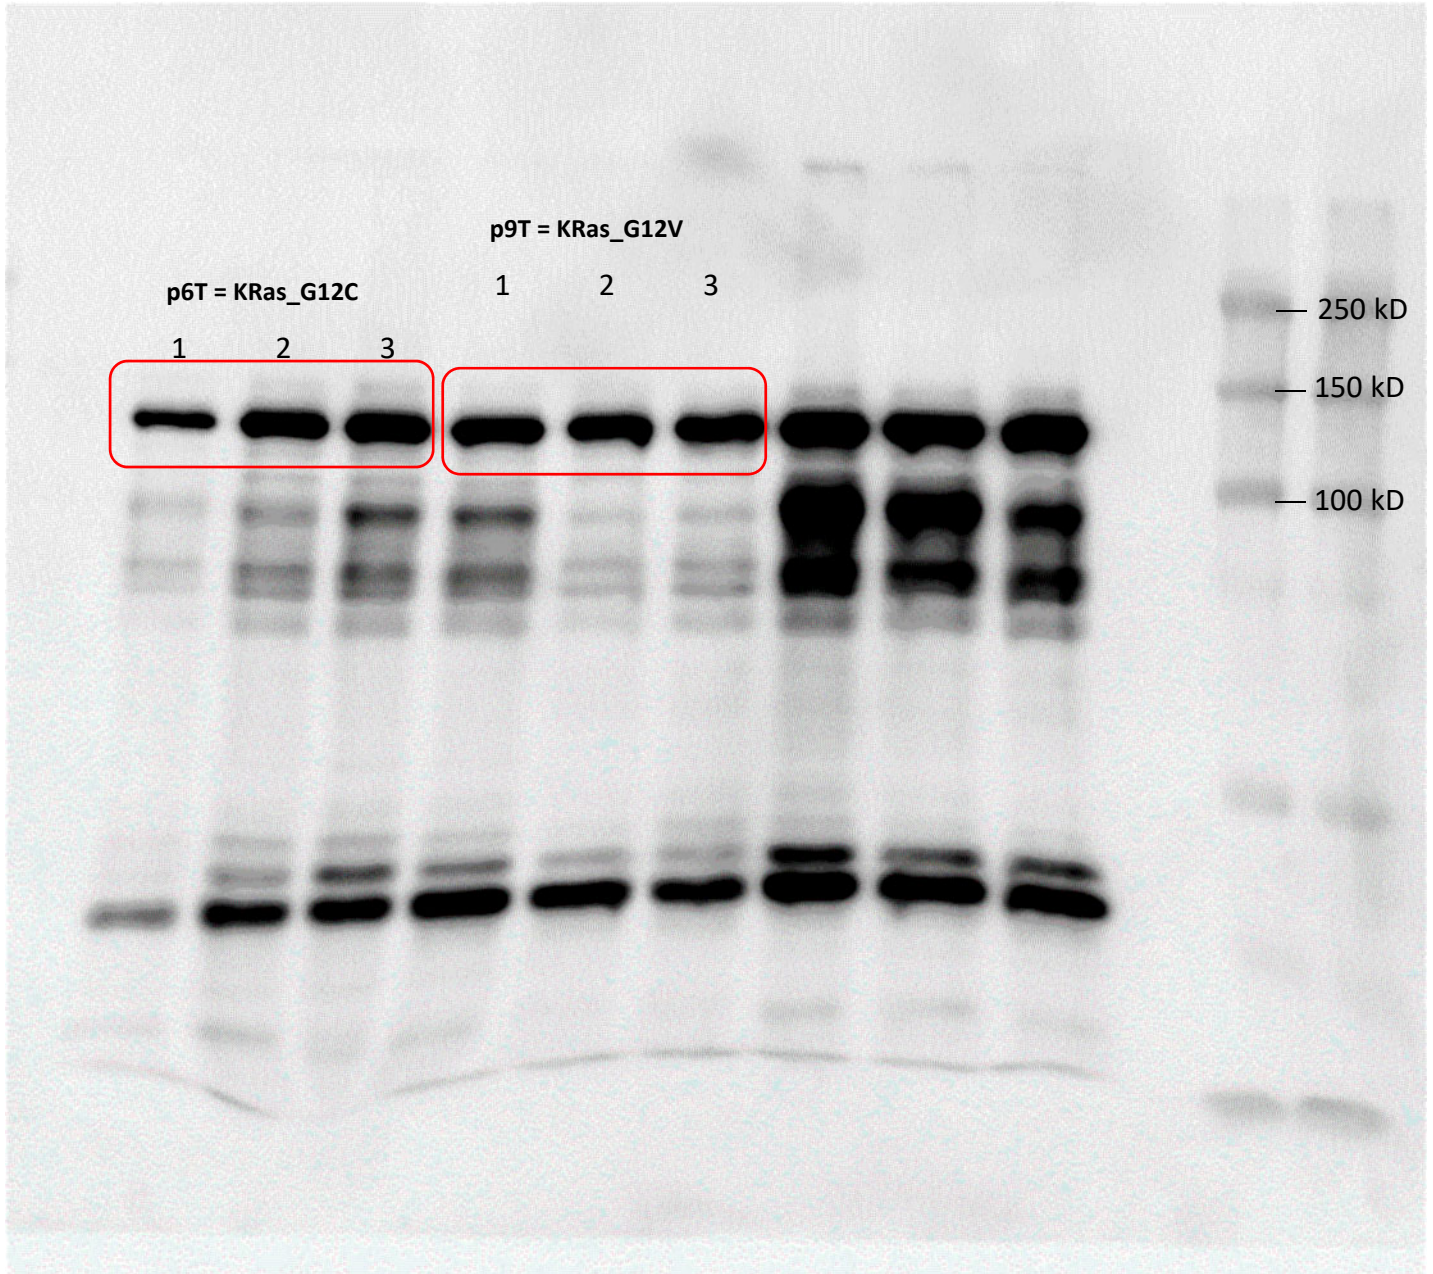

- 1 no\_EGF
- 2 low\_EGF
- 3 normal\_EGF

signal cranked up
